# Supplementary material for: Synthesis of a luminescent macrocycle and its crystalline structure-adaptive transformation
Source: Royal Society of Chemistry journal article supplement (doi:10.1039/d2qo00926a), 2022-01-01
Supplement: d2qo00926a1.pdf [file d2qo00926a1.pdf]

## Supplementary Information

### Synthesis of a luminescent macrocycle and its crystalline structure-adaptive transformation

Shuo Li,<sup>a</sup> Zhi-Yuan Zhang,<sup>b</sup> Haichang Zhang,<sup>\*c</sup> Yue-Ling Bai,<sup>\*a</sup> Lei Cui,<sup>a</sup> and Chunju Li<sup>\*a,b</sup>

<sup>a</sup>College of Science, Shanghai University, Shanghai 200444, P. R. China. E-mail: yuelingbai@shu.edu.cn

<sup>b</sup>Tianjin Key Laboratory of Structure and Performance for Functional Molecules, College of Chemistry, Tianjin Normal University, Tianjin 300387, P. R. China. E-mail: cjli@shu.edu.cn

<sup>c</sup>Science and Technology on Power Sources Laboratory, Tianjin Institute of Power Sources, Tianjin, 300384, P. R. China. E-mail: hchzhang@tju.edu.cn

## Table of Contents

|                                                                                      |            |
|--------------------------------------------------------------------------------------|------------|
| <b>1. Materials and methods</b>                                                      | <b>S3</b>  |
| <b>2. Experimental details</b>                                                       | <b>S4</b>  |
| <b>3. <sup>1</sup>H NMR, <sup>13</sup>C NMR, high resolution mass spectra (HRMS)</b> | <b>S5</b>  |
| <b>4. Photophysical Properties of macrocycle and monomer</b>                         | <b>S8</b>  |
| <b>5. Powder XRD Patterns</b>                                                        | <b>S9</b>  |
| <b>6. Thermogravimetric analysis</b>                                                 | <b>S10</b> |
| <b>7. Adsorption and desorption study of aromatic vapor</b>                          | <b>S13</b> |
| <b>8. Crystallography data</b>                                                       | <b>S22</b> |

## 1. Materials and methods

All reagents were purchased commercially and used without further purification unless otherwise noted.  $^1\text{H}$  NMR and  $^{13}\text{C}$  NMR spectra were recorded using a Bruker Avance 500 MHz spectrometer. High-resolution mass spectra (HRMS) was determined on a Bruker Daltonics, Inc. APEXIII 7.0 TESLA FTMS instrument. Powder X-ray diffraction (PXRD) data were measured with a powder X-ray diffractometer (DX-2700).. PL spectra were obtained on RF-6000. Quantum efficiency and lifetime were measured on FLS1000. Melting points were obtained on an X-4 digital melting point apparatus without correction. ALL single crystal X-ray data were measured by direct methods using Bruker SMART APEX II). Thermogravimetric Analysis (TGA) was recorded using a Instrument NETZSCH STA 449F5 and the samples were heated under nitrogen gas at a rate of 10 °C/min. Diffuse reflectance spectra were recorded with a UV-3600iPlus spectrometer. Detailed experimental procedure: 1) about 20 mg of the sample was added to the integrating sphere to prepare a smooth film; 2) According to the instructions of UV-3600iPlus spectrometer, place Spectralon Reference Standard at the sampling port for reference scanning; 3) Remove Spectralon Reference Standard and place the sample at the sample port for diffuse reflectance spectrum scanning

## 2. Synthesis

**Monomer.** Under the protection of N<sub>2</sub> atmosphere, 2-(bis(4-bromophenyl)methylene)malononitrile (3.86 g, 10.0 mmol), 2,4-diethoxybenzeneboronic acid (5.25 g, 25.0 mmol), and tetrakis(triphenylphosphine)palladium(0) (1.16 g, 1.00 mmol) were dissolved in tetrahydrofuran (200 mL). The sodium carbonate (4.24 g, 40.0 mmol) in water (20 mL) was added into the solution and stirred for 24 h at 82 °C. Upon cooling to room temperature, water (100 mL), dichloromethane (100 mL) was added and stirred. After filtration of the solution, the solution was partitioned between dichloromethane and water. The product was extracted from the organic layer. The aqueous layer was further extracted twice with dichloromethane (50 mL). The combined organic layer was dried over anhydrous Na<sub>2</sub>SO<sub>4</sub> and evaporated under reduced pressure. The product was purified by column chromatography on silica gel (eluent: 2/1, v/v, dichloromethane:petroleum ether) to give yellow product monomer (4.91g, 87%). m.p. 123-124 °C; <sup>1</sup>H NMR (500 MHz, CDCl<sub>3</sub>, 298K) δ 7.69 (d, *J* = 5.0 Hz, 4H), 7.52 (d, *J* = 5.0 Hz, 4H), 7.31 (d, *J* = 10 Hz, 2H), 6.59 - 6.55 (m, 4H), 4.09 (q, *J* = 5.0 Hz, 4H), 4.06 (q, *J* = 5.0 Hz, 4H), 1.45 (t, *J* = 7.5 Hz, 6H), 1.38 (t, *J* = 7.5 Hz, 6H). <sup>13</sup>C NMR (125 MHz, CDCl<sub>3</sub>, 298K) δ 175.0, 160.6, 157.2, 143.5, 133.9, 131.5, 130.7, 129.6, 121.7, 114.8, 105.8, 100.6, 79.4, 64.2, 63.8, 15.0, 14.8. HRMS (ESI) *m/z*: [M+Na]<sup>+</sup> calculated for [C<sub>36</sub>H<sub>34</sub>N<sub>2</sub>O<sub>4</sub>Na]<sup>+</sup>, 581.2411; found, 581.2414.

**MC.** To the solution of monomer (2.28 g, 5.00 mmol) in chloroform (200 mL) was added paraformaldehyde (0.450 g, 30.0 mmol). Boron trifluoride diethyl etherate (0.650 ml, 10.0 mmol) was then added to the reaction mixture. The mixture was stirred at 25 °C for 25 minutes. Then the reaction was quenched by addition of 200 mL saturated aqueous NaHCO<sub>3</sub>. The organic phase was separated and washed with saturated NaHCO<sub>3</sub> solution and brine. The organic layer was dried over anhydrous Na<sub>2</sub>SO<sub>4</sub> and evaporated. The product was purified by column chromatography on silica gel (eluent: 100/1, v/v, dichloromethane: ethyl acetate) to obtain product MC (0.598g, 21%) as a yellow solid. m.p. > 320 °C; <sup>1</sup>H NMR (500 MHz, CDCl<sub>3</sub>, 298K) δ 7.57 (d, *J* = 10 Hz, 8H), 7.40 (d, *J* = 10 Hz, 8H), 6.94 (s, 4H), 6.55 (s, 4H), 4.09 (q, *J* = 5.0 Hz, 8H), 4.04 (q, *J* = 5.0 Hz, 8H), 1.41 (t, *J* = 7.5 Hz, 12H), 1.37 (t, *J* = 5.0 Hz, 12H). <sup>13</sup>C NMR (125 MHz, CDCl<sub>3</sub>, 298K) δ 175.2, 158.2, 155.5, 143.6, 133.8, 131.6, 130.6, 129.5, 122.6, 120.6, 114.8, 98.1, 79.1, 64.7, 64.2, 28.0, 15.0, 15.0. HRMS (ESI) *m/z*: [M+Na]<sup>+</sup> calculated for [C<sub>74</sub>H<sub>68</sub>N<sub>4</sub>O<sub>8</sub>Na]<sup>+</sup>, 1129.4929; found, 1129.4923.

### 3. $^1\text{H}$ NMR, $^{13}\text{C}$ NMR, HMRS spectra

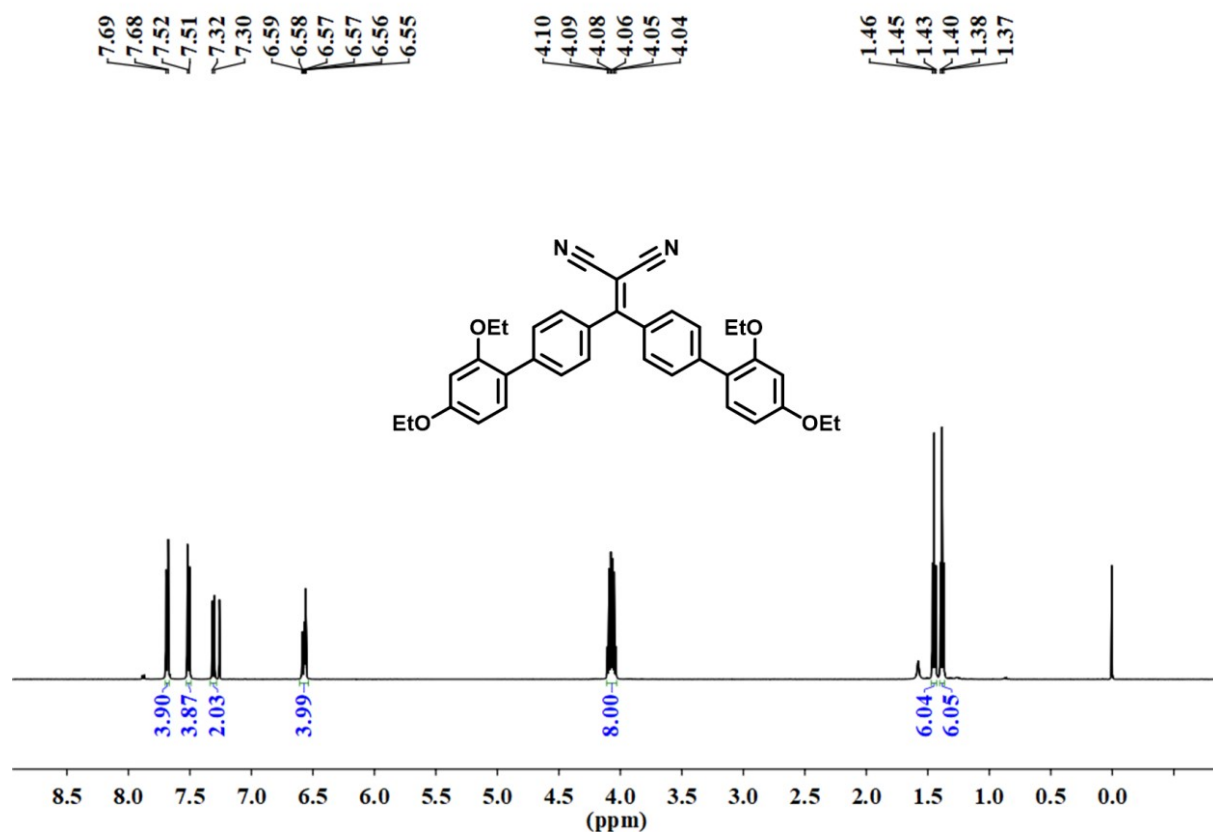

Fig. S1  $^1\text{H}$  NMR spectrum (500 MHz,  $\text{CDCl}_3$ , 298K) of monomer.

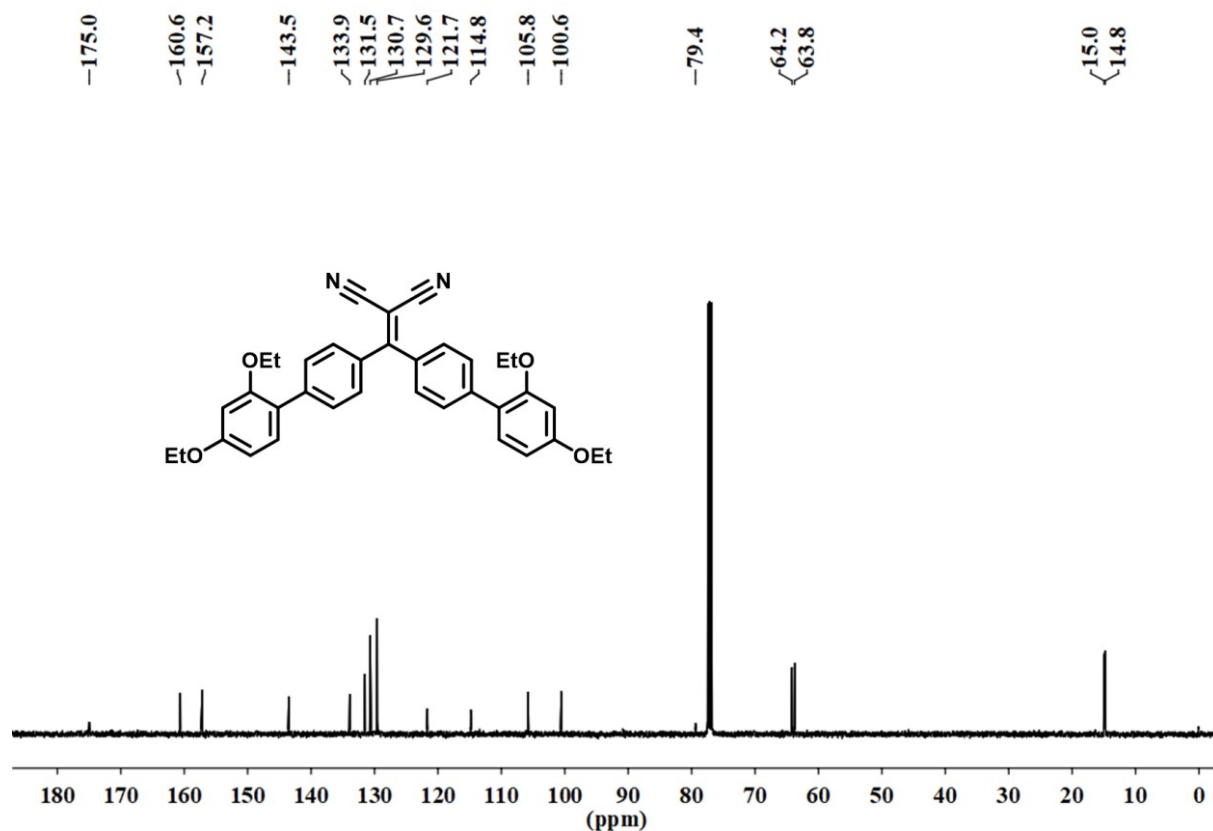

Fig. S2  $^{13}\text{C}$  NMR spectrum (125 MHz,  $\text{CDCl}_3$ , 298K) of monomer.

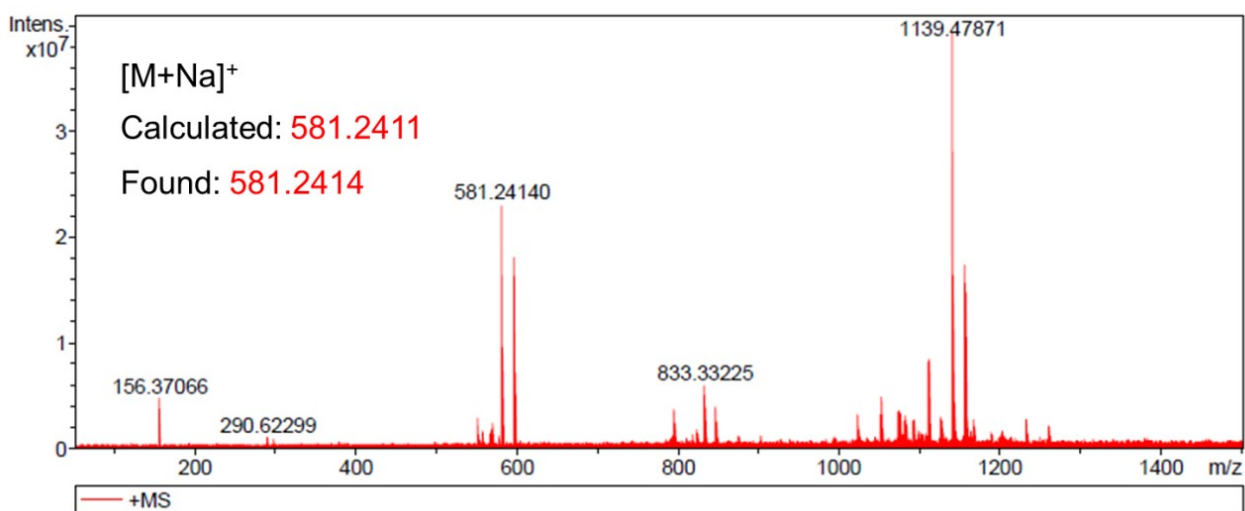

Fig. S3 HRMS spectrum of monomer.

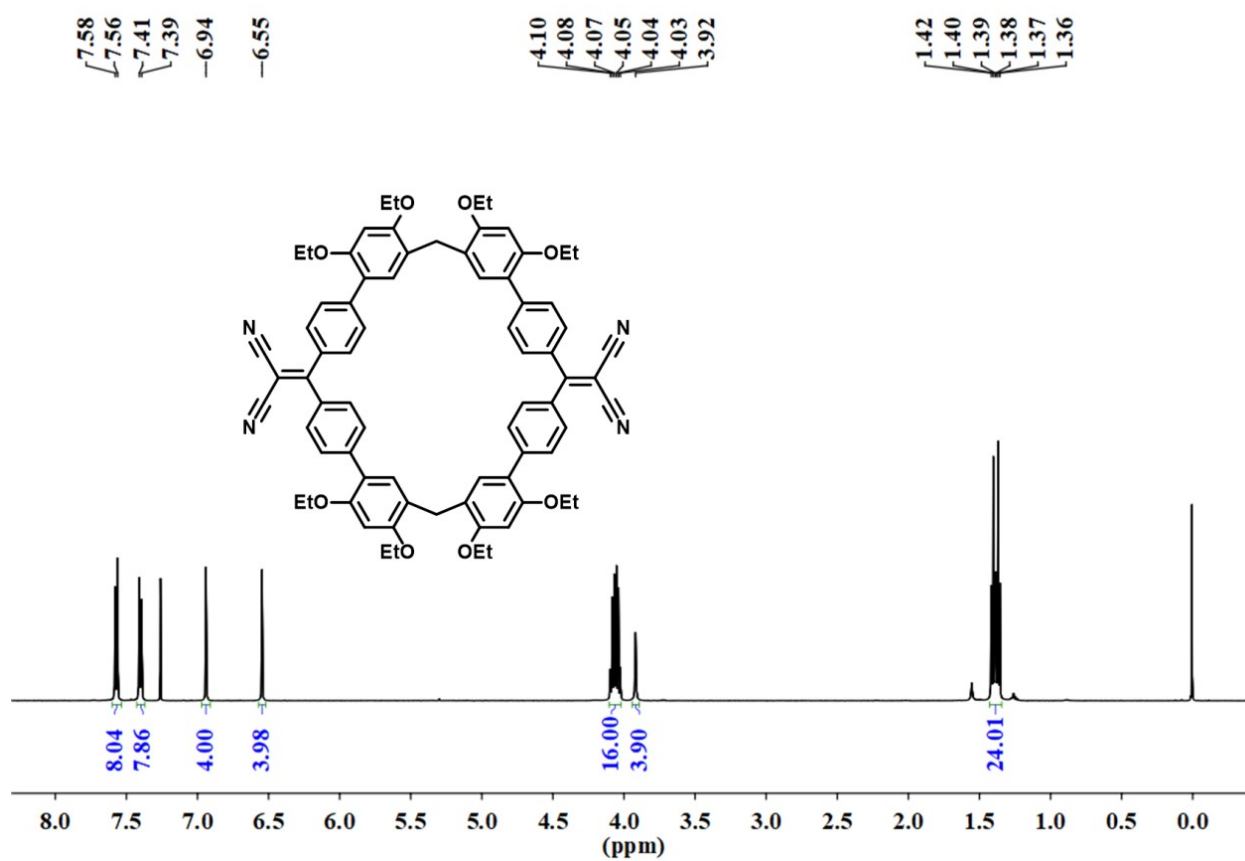

Fig. S4  $^1H$  NMR spectrum (500 MHz,  $CDCl_3$ , 298K) of MC.

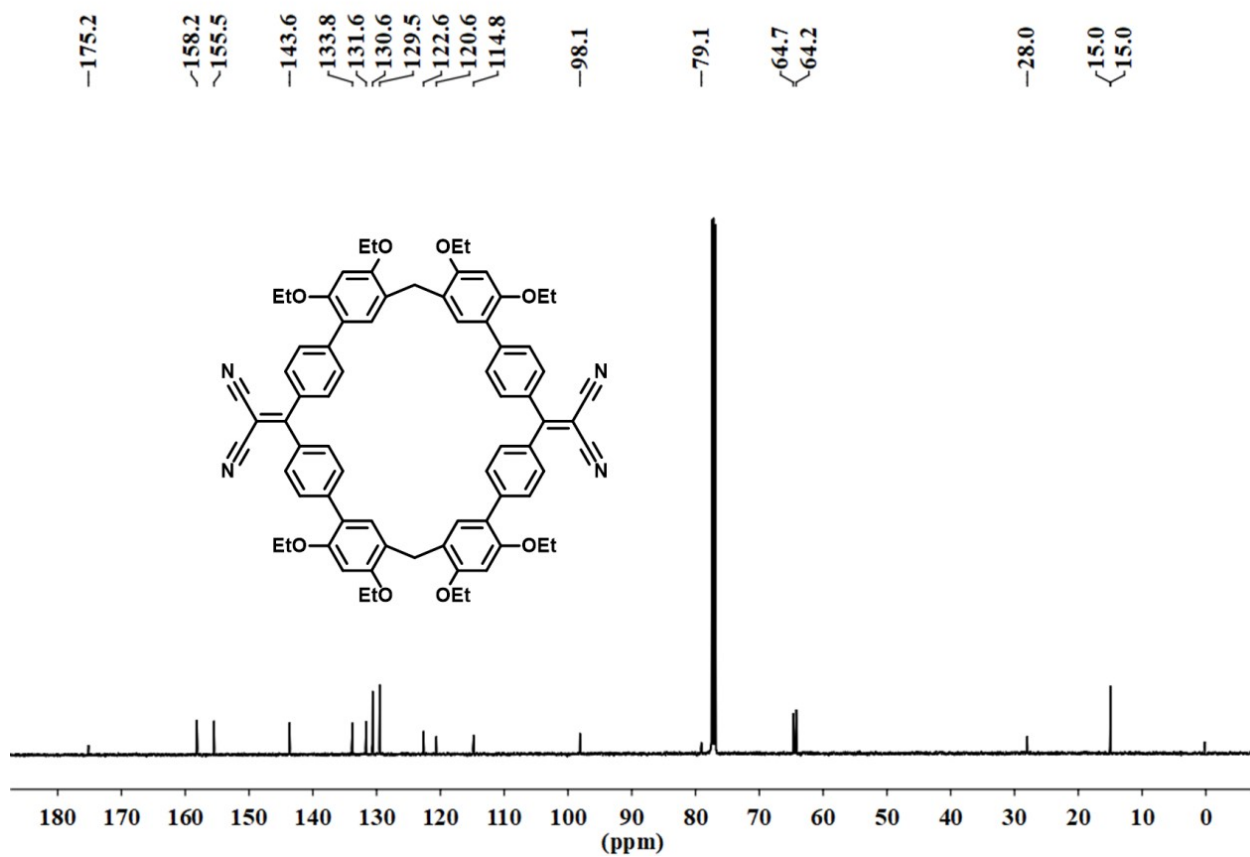

Fig. S5 <sup>13</sup>C NMR spectrum (125 MHz, CDCl<sub>3</sub>, 298K) of MC.

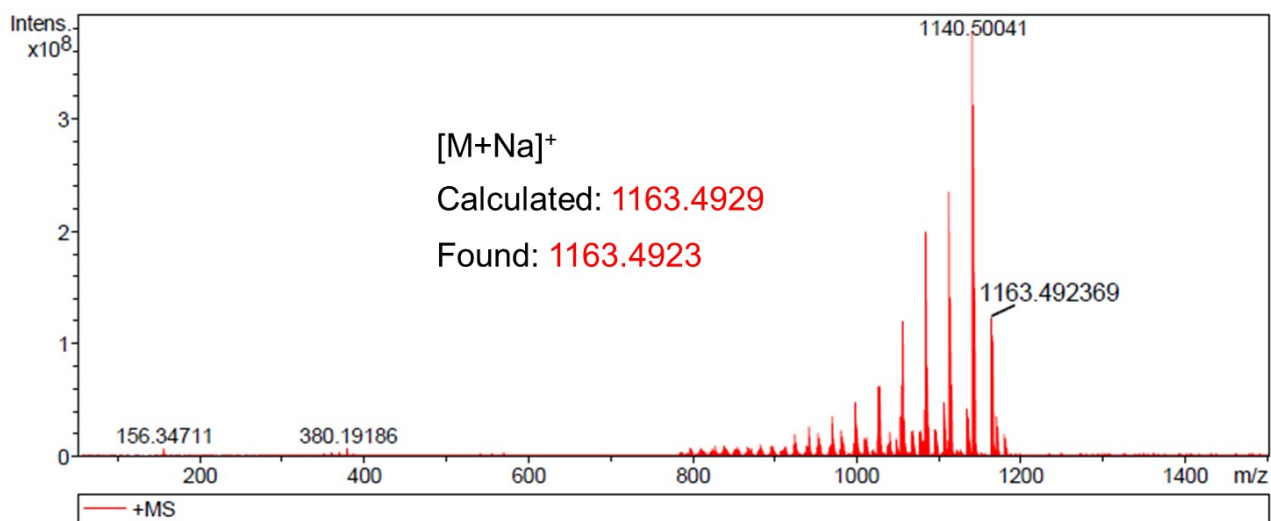

Fig. S6 HMRS spectrum of MC.

#### 4. Photophysical Properties of macrocycle and monomer

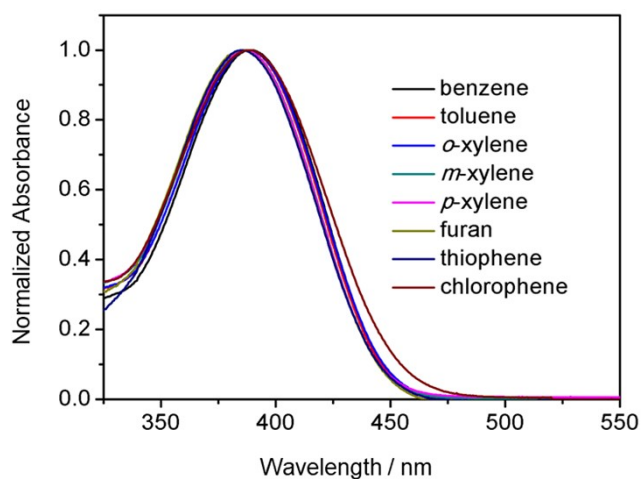

**Fig. S7** The UV-vis spectra of the macrocycle MC in different solutions.

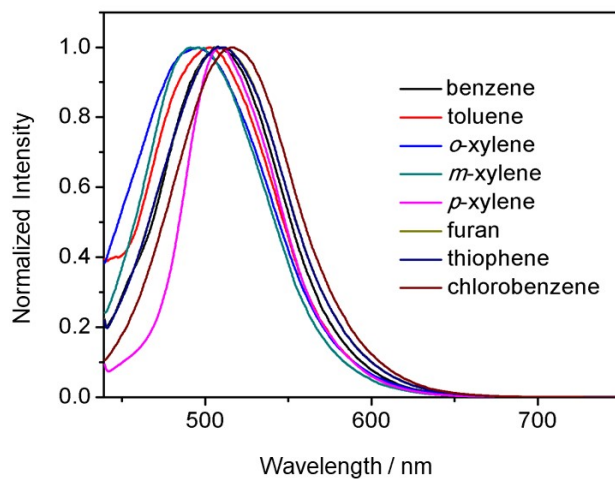

**Fig. S8** Normalized photoluminescence spectrum of the macrocycle MC in different solutions.

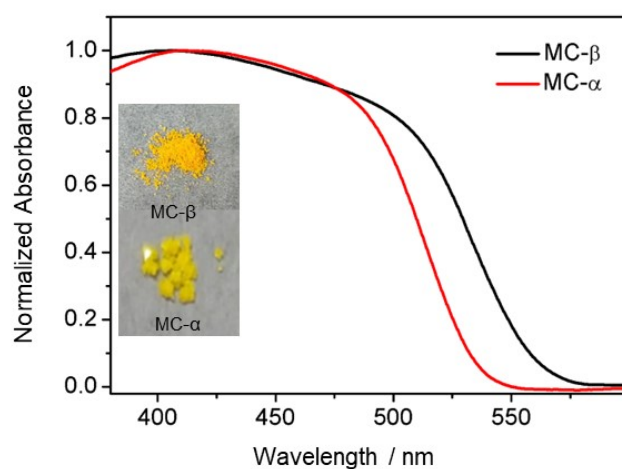

**Fig. S9** Diffuse reflectance spectra of **MC-β** and **MC-α**. (Insets: photographs of **MC-β** and **MC-α** in the sunlight).



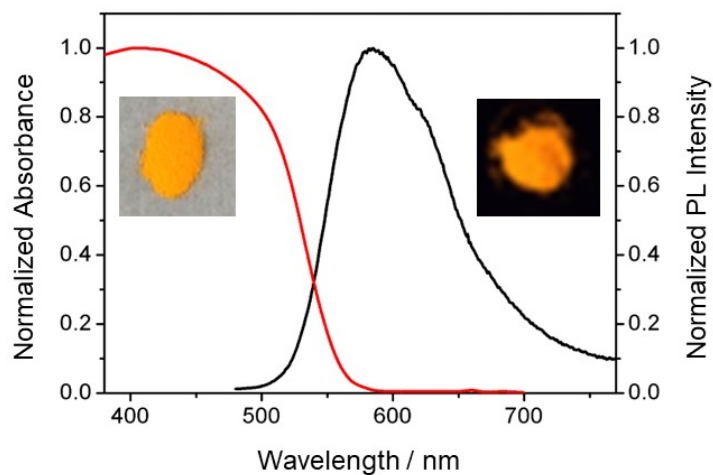

**Fig. S10** Diffuse reflectance spectra and PL spectra of **MC-γ**. (Insets: photographs of **MC-γ** under 365 nm the sunlight and UV illuminations).

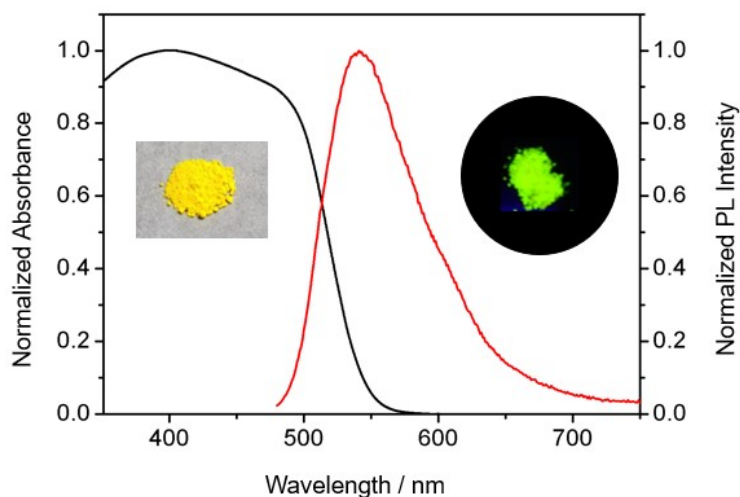

**Fig. S11** Diffuse reflectance spectra and PL spectra of monomer crystals.

## 5. Powder XRD Patterns

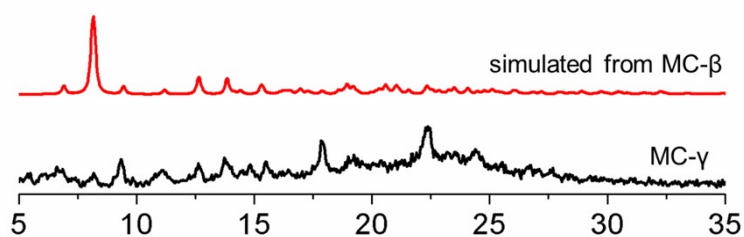

**Fig. S12** PXRD patterns of **MC-γ** and simulated from **MC-β**.

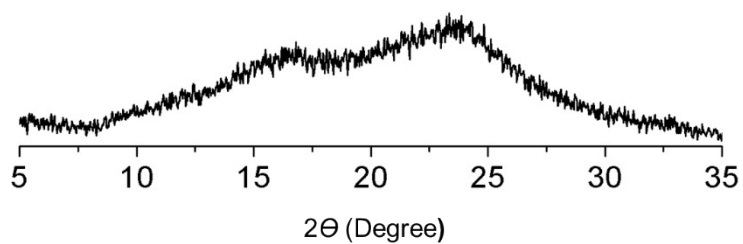

**Fig. S13** PXR D patterns of MC- $\alpha$  in ground states.

## 6. Thermogravimetric Analysis

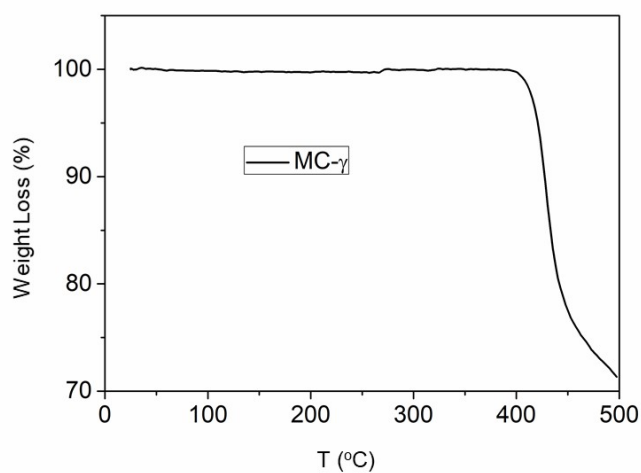

**Fig. S14** TGA curve of MC- $\gamma$  recorded under a nitrogen atmosphere.

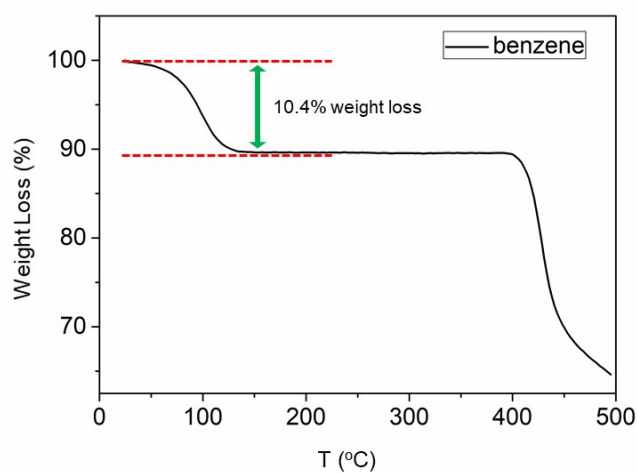

**Fig. S15** TGA curve of MC- $\gamma$  after uptake of benzene.

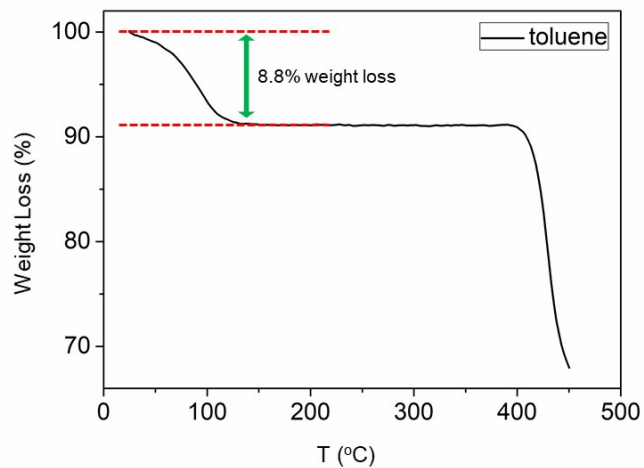

**Fig. S16** TGA curve of MC- $\gamma$  after uptake of toluene.

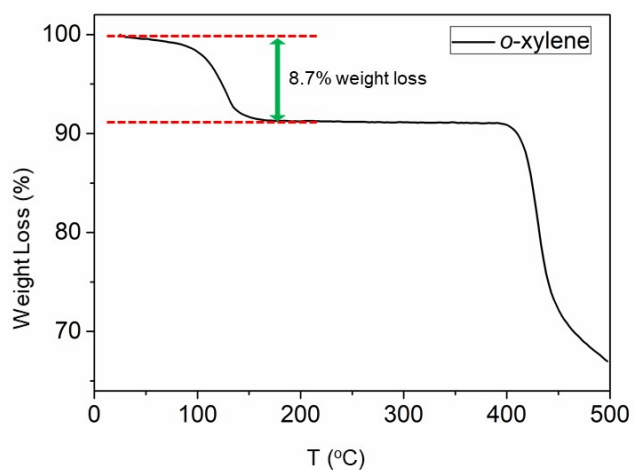

**Fig. S17** TGA curve of MC- $\gamma$  after uptake of *o*-xylene.

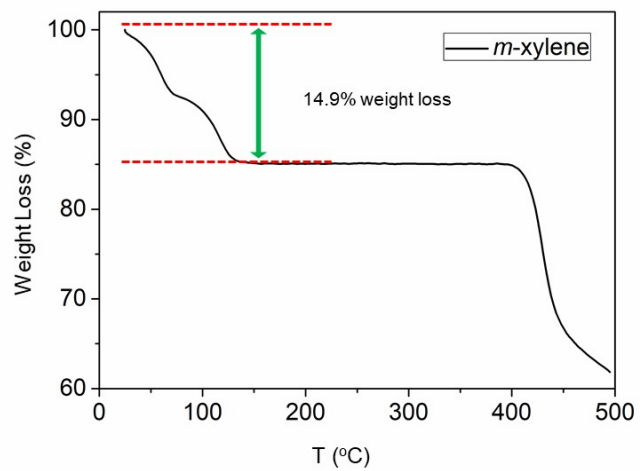

**Fig. S18** TGA curve of MC- $\gamma$  after uptake of *m*-xylene.

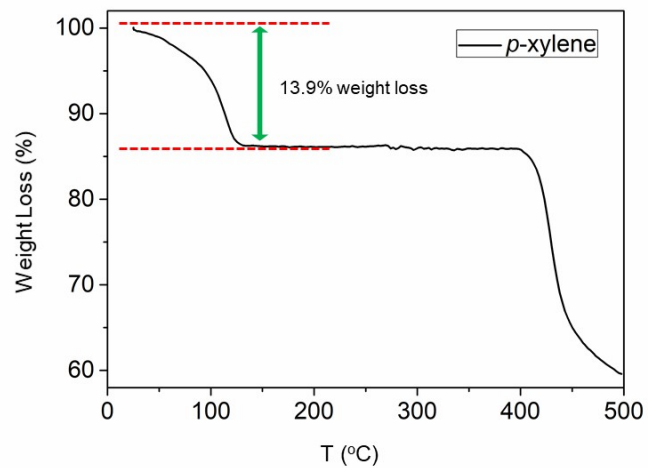

**Fig. S19** TGA curve of MC- $\gamma$  after uptake of *p*-xylene.

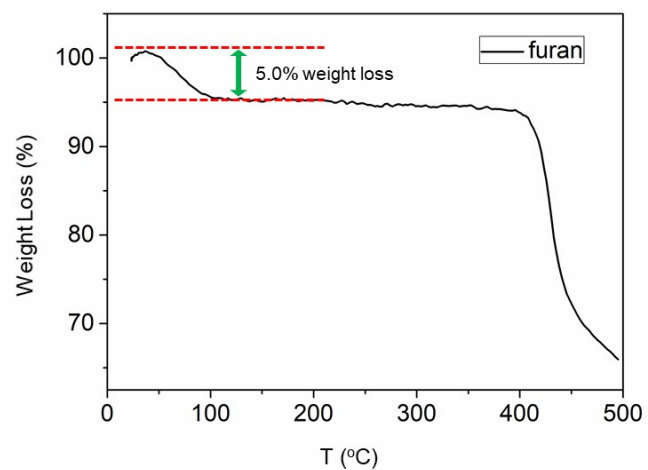

**Fig. S20** TGA curve of MC- $\gamma$  after uptake furan.

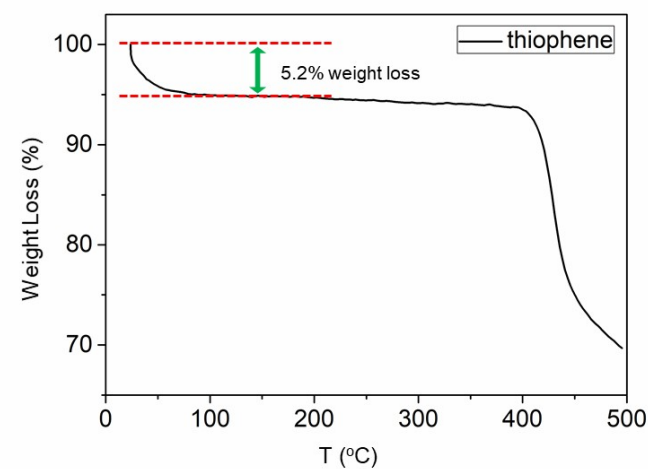

**Fig. S21** TGA curve of MC- $\gamma$  after uptake thiophene.

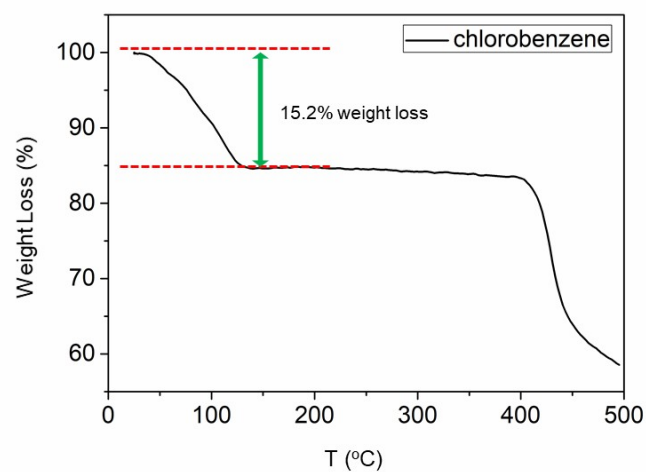

**Fig. S22** TGA curve of MC- $\gamma$  after uptake chlorobenzene.

## 7. Adsorption and desorption study of aromatic vapor

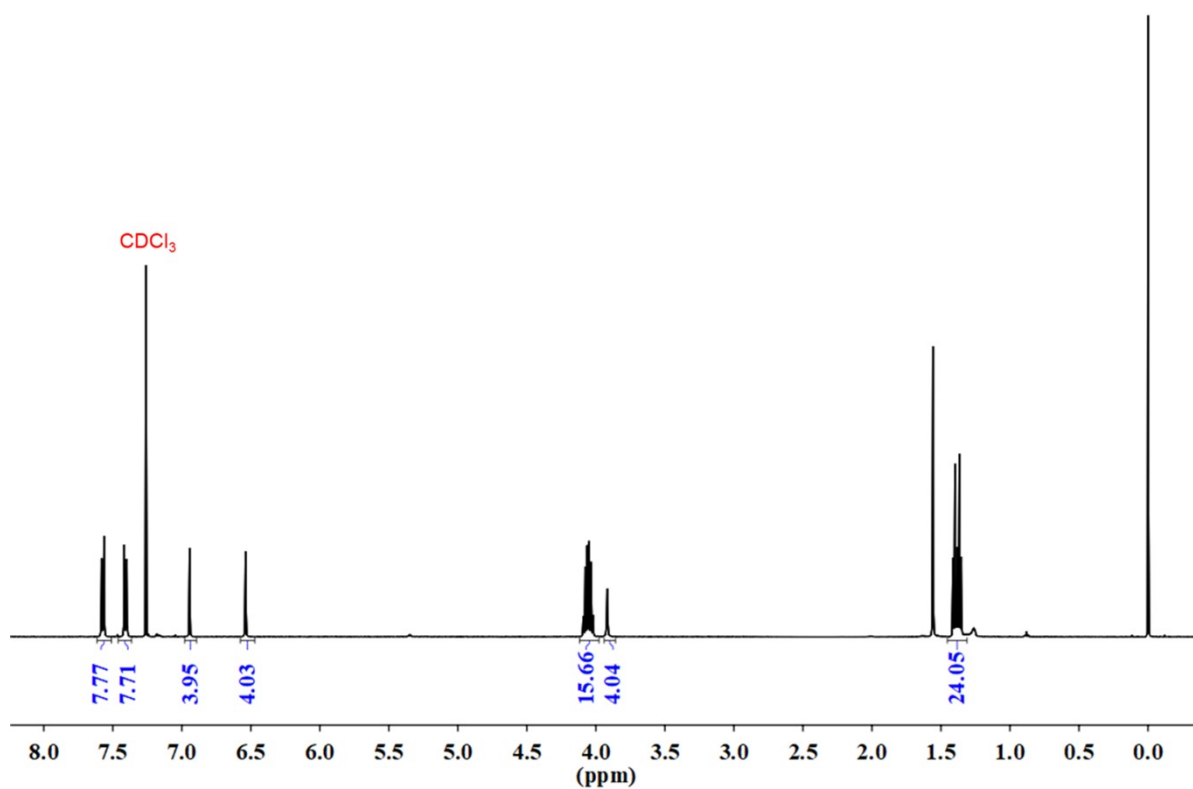

**Fig. S23**  $^1\text{H}$  NMR (500 MHz,  $\text{CDCl}_3$ ) spectrum of MC- $\gamma$ .

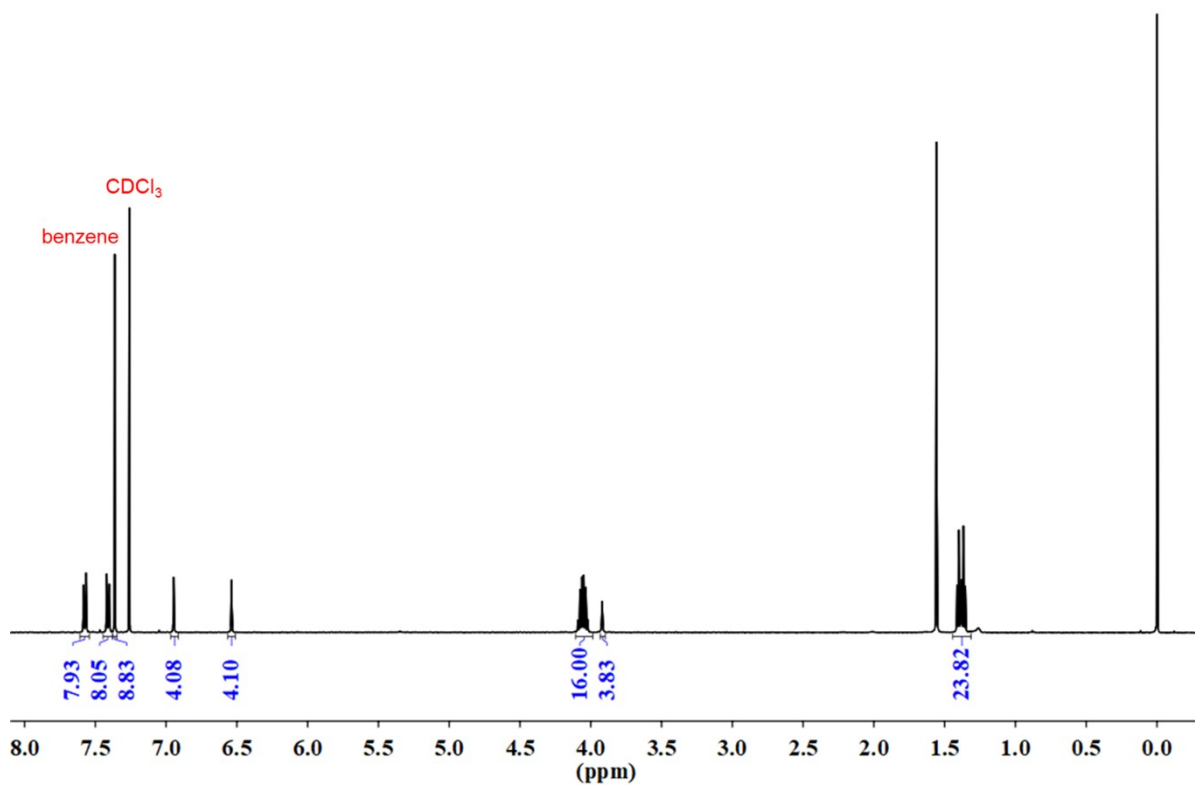

Fig. S24 <sup>1</sup>H NMR (500 MHz, CDCl<sub>3</sub>) spectrum of MC- $\gamma$  after uptake of benzene.

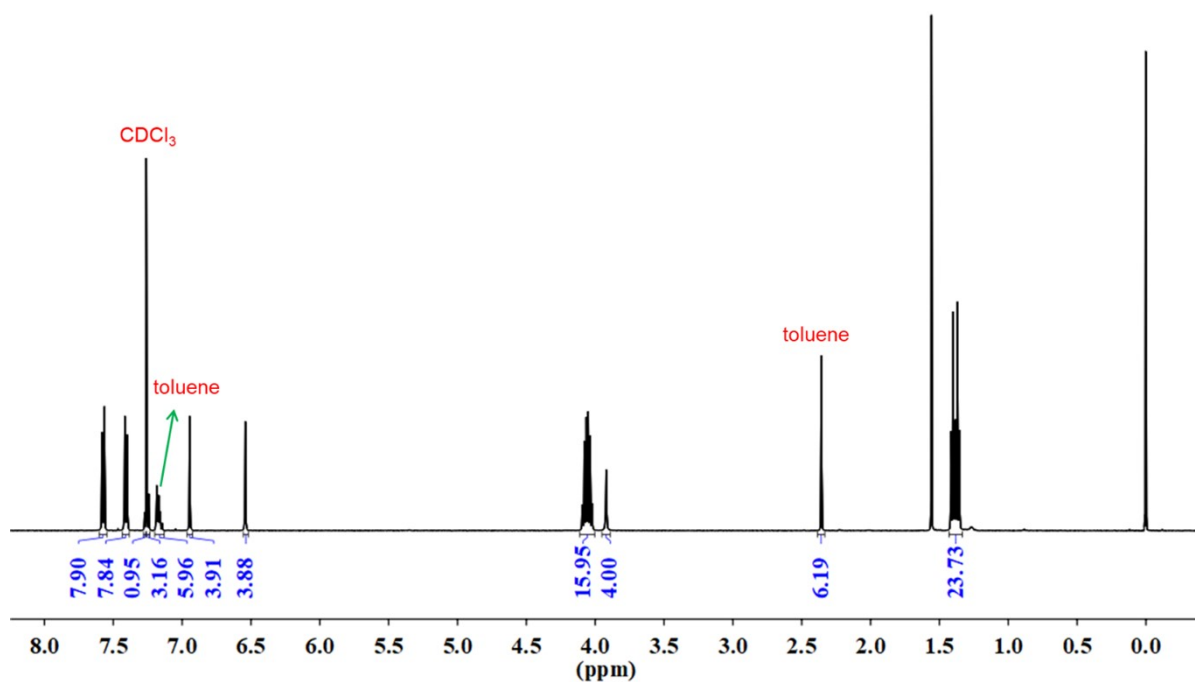

Fig. S25 <sup>1</sup>H NMR (500 MHz, CDCl<sub>3</sub>) spectrum of MC- $\gamma$  after uptake of toluene.

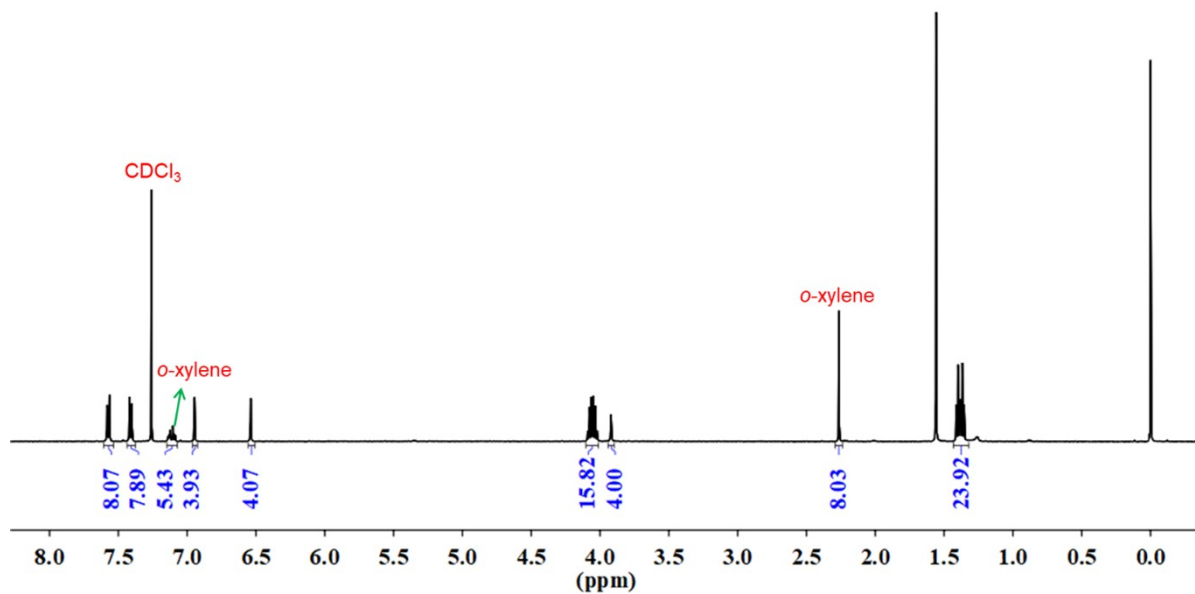

Fig. S26 <sup>1</sup>H NMR (500 MHz, CDCl<sub>3</sub>) spectrum of MC- $\gamma$  after uptake of *o*-xylene.

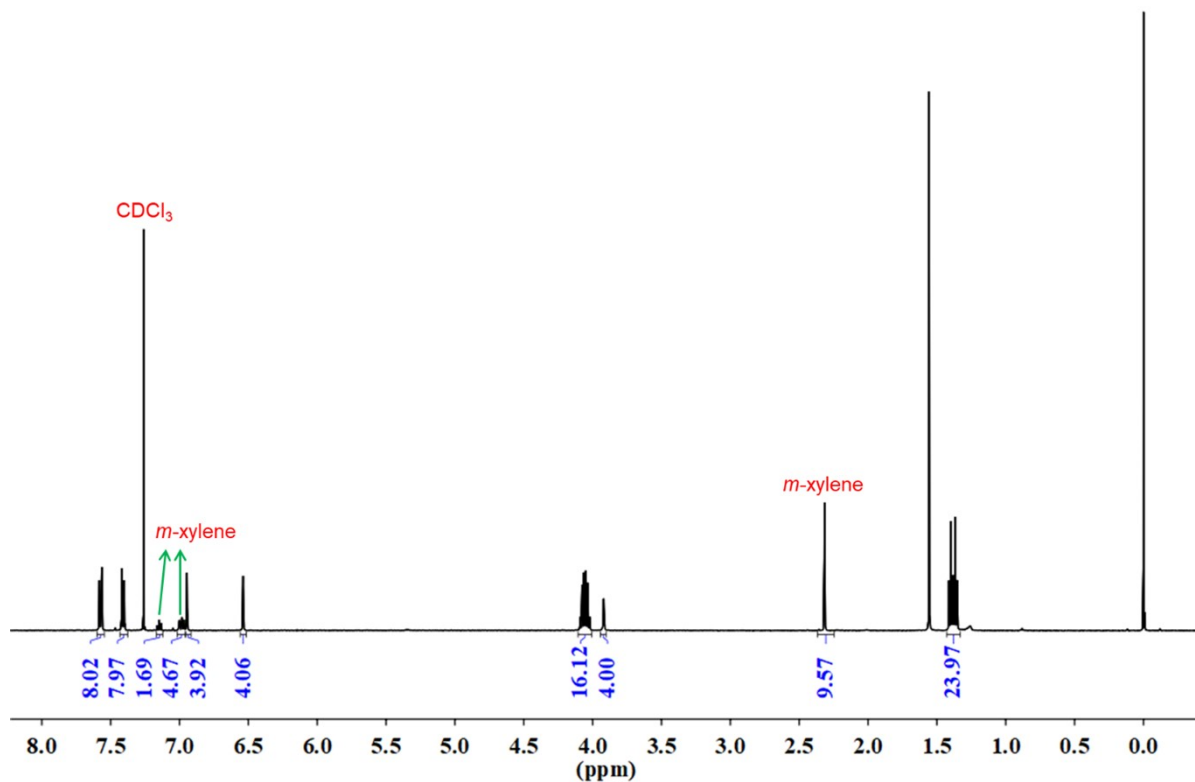

Fig. S27 <sup>1</sup>H NMR (500 MHz, CDCl<sub>3</sub>) spectrum of MC- $\gamma$  after uptake of *m*-xylene.

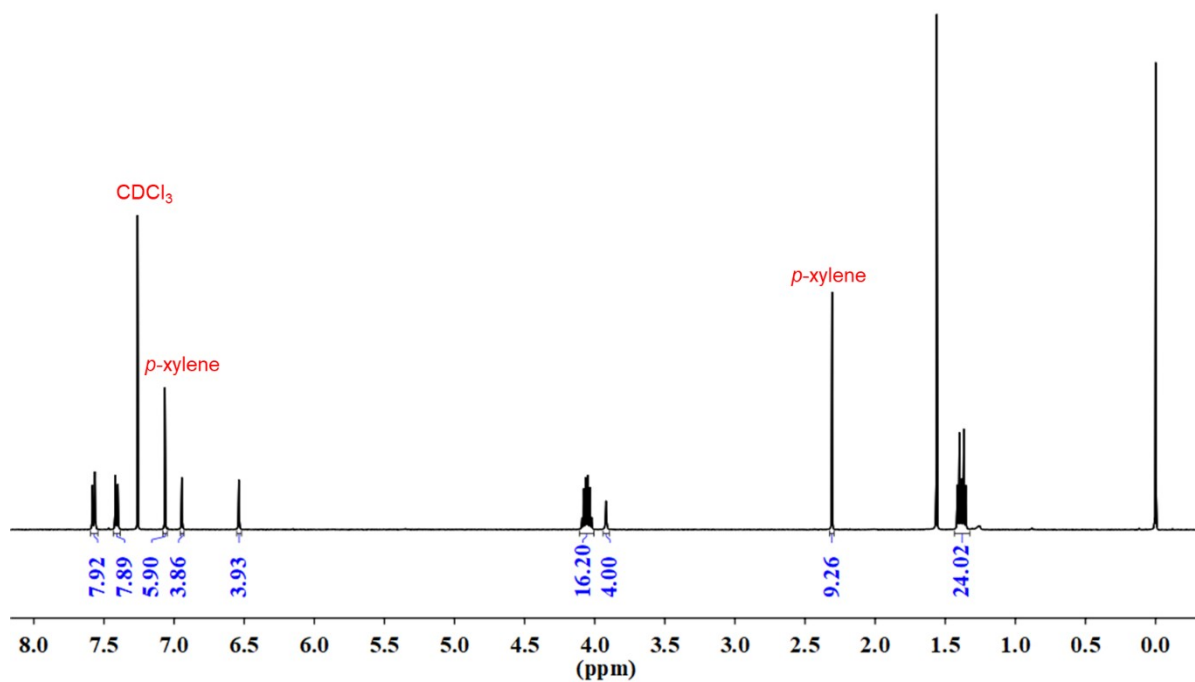

Fig. S28  $^1\text{H}$  NMR (500 MHz,  $\text{CDCl}_3$ ) spectrum of MC- $\gamma$  after uptake of *p*-xylene.

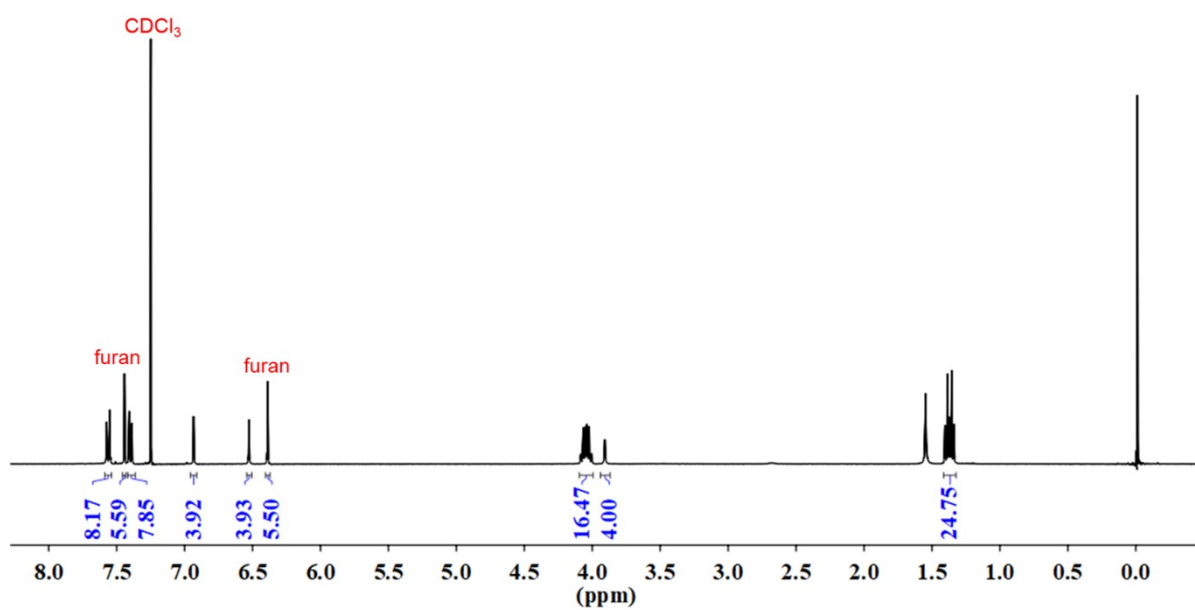

Fig. S29  $^1\text{H}$  NMR (500 MHz,  $\text{CDCl}_3$ ) spectrum of MC- $\gamma$  after uptake of furan.



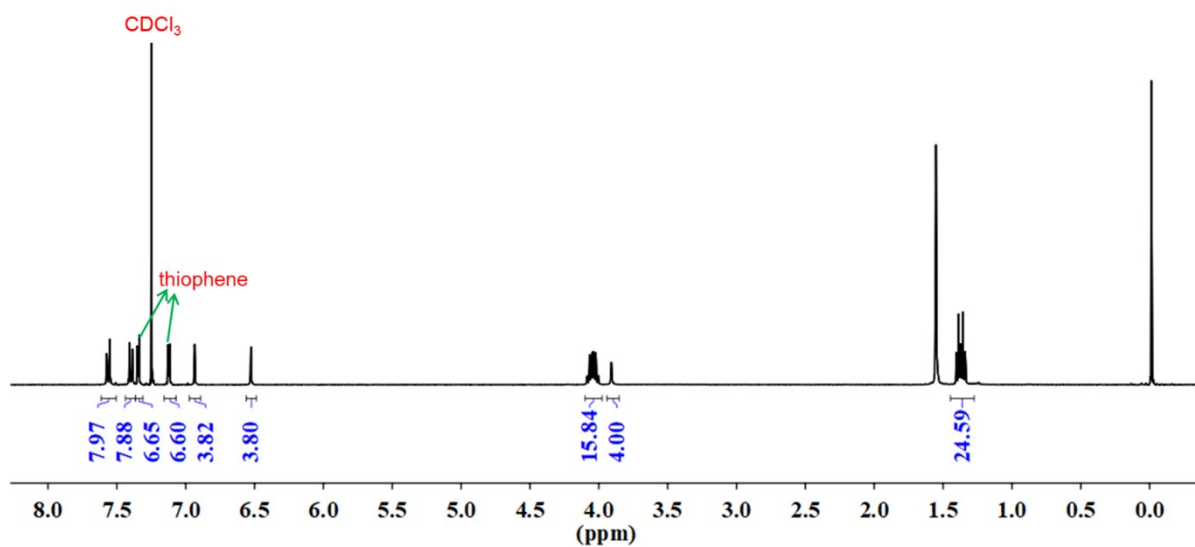

Fig. S30 <sup>1</sup>H NMR (500 MHz, CDCl<sub>3</sub>) spectrum of MC-γ after uptake of thiophene.

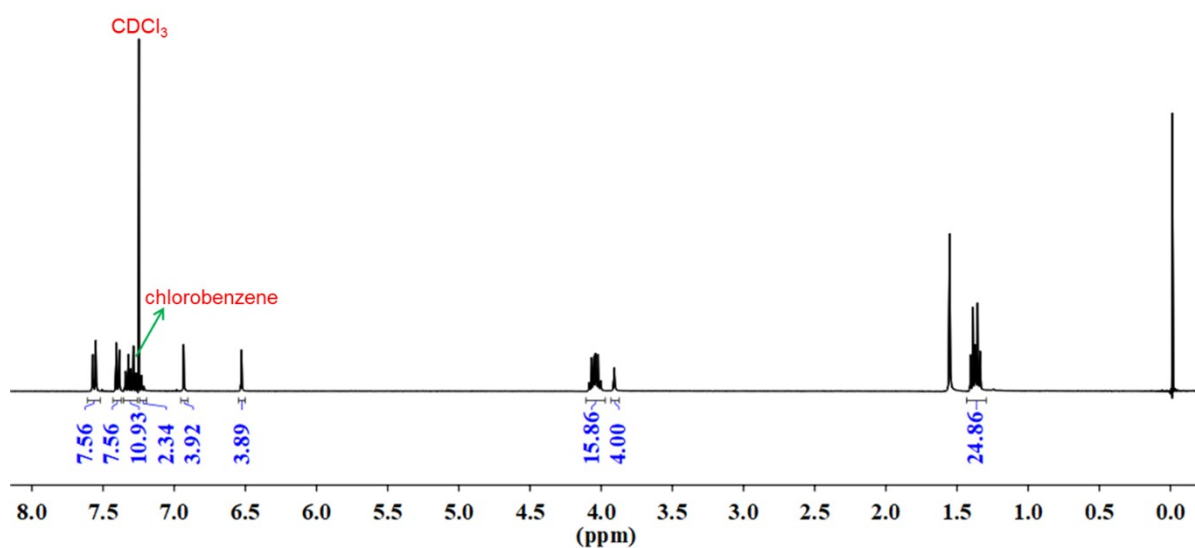

Fig. S31 <sup>1</sup>H NMR (500 MHz, CDCl<sub>3</sub>) spectrum of MC-γ after uptake of chlorobenzene.

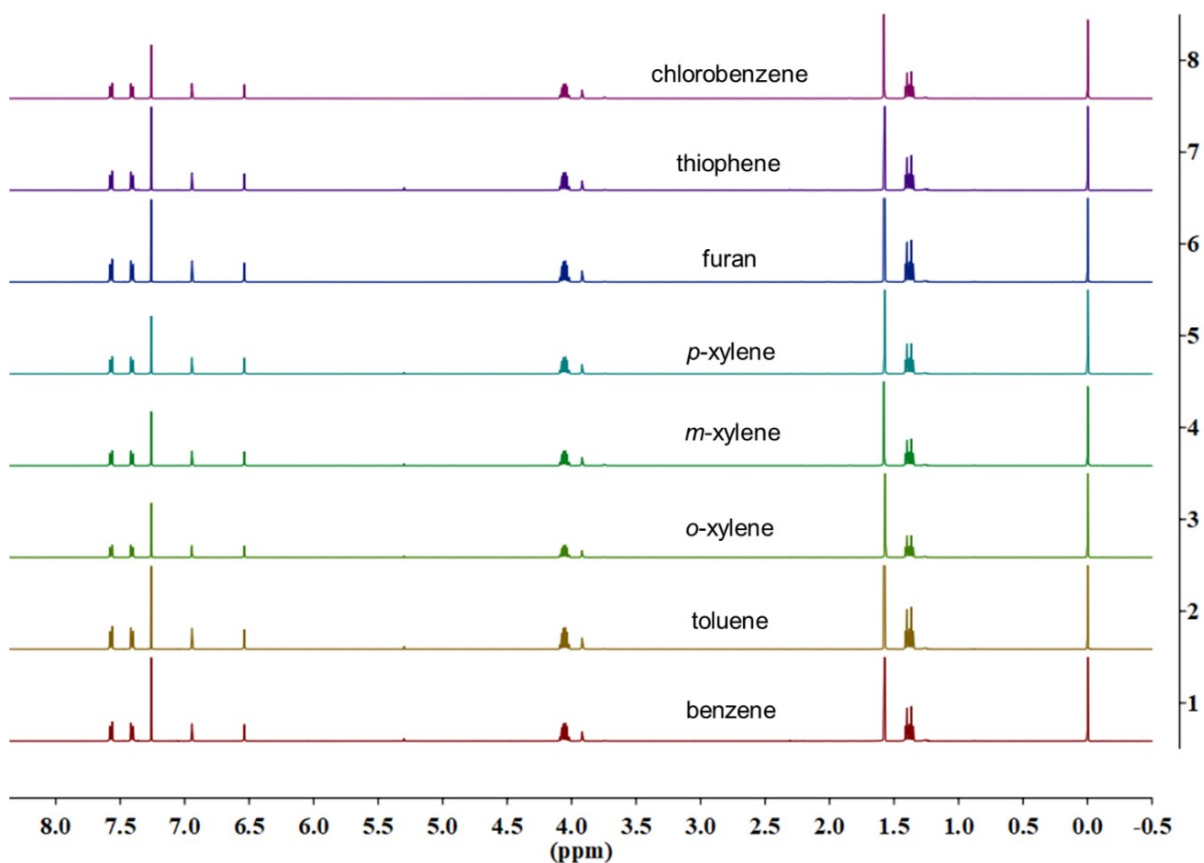

**Fig. S32**  $^1\text{H}$  NMR (500 MHz,  $\text{CDCl}_3$ ) spectrum of aromatics-loaded  $\text{MC-}\gamma$  after desorption of aromatics under vacuum at  $65\text{ }^\circ\text{C}$  for 12 h.

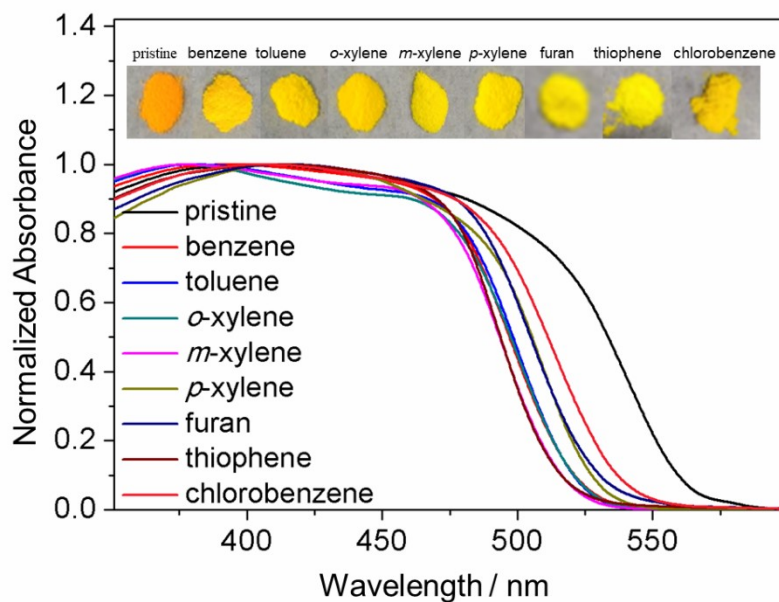

**Figure S33** Normalized diffuse reflectance spectra of  $\text{MC-}\gamma$  before and after uptake of aromatic vapors (insets: photographs of  $\text{MC-}\gamma$  before and after exposure to various aromatic vapors in the sunlight).

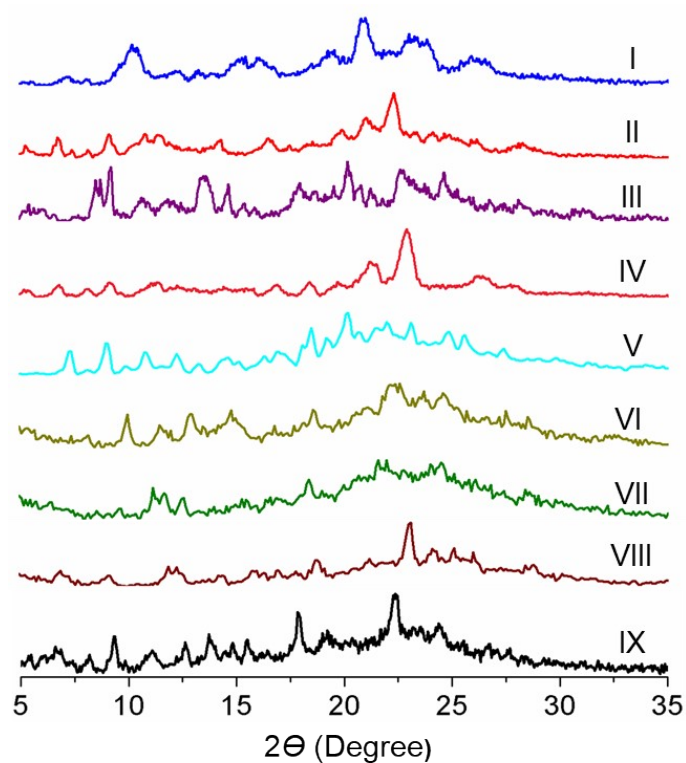

**Fig. S34** PXR D patterns of MC- $\gamma$  before (IX) and after capture of (I) benzene, (II) toluene, (III) o-xylene, (IV) m-xylene, (V) p-xylene, (VI) furan, (VII) thiophene, and (VIII) chlorobenzene.

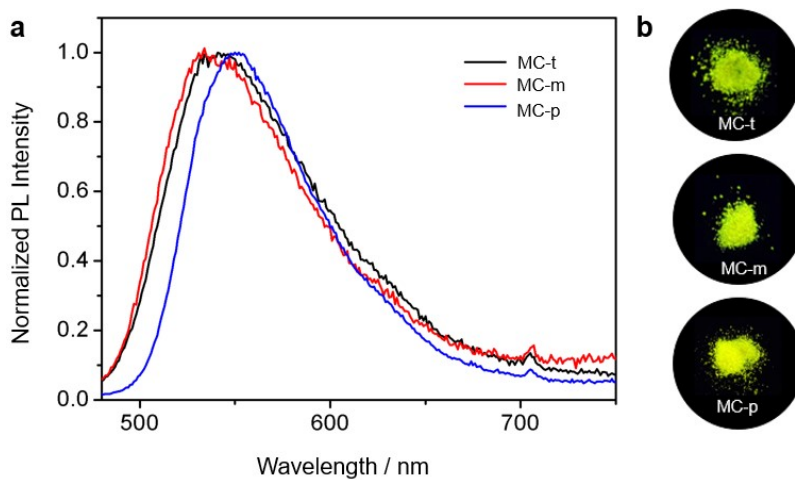

**Fig. S35** (a) Normalized PL spectra of MC-t, MC-m and MC-p. (b) Photos of MC-t, MC-m and MC-p under 365 nm UV illuminations.

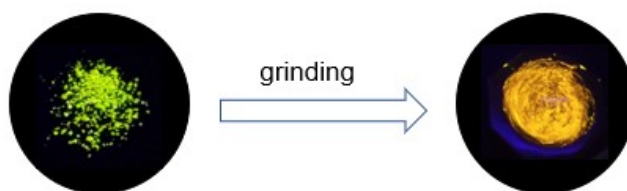

**Fig. S36** Photographs of MC- $\alpha$  before and after grinding under 365 nm UV illuminations.

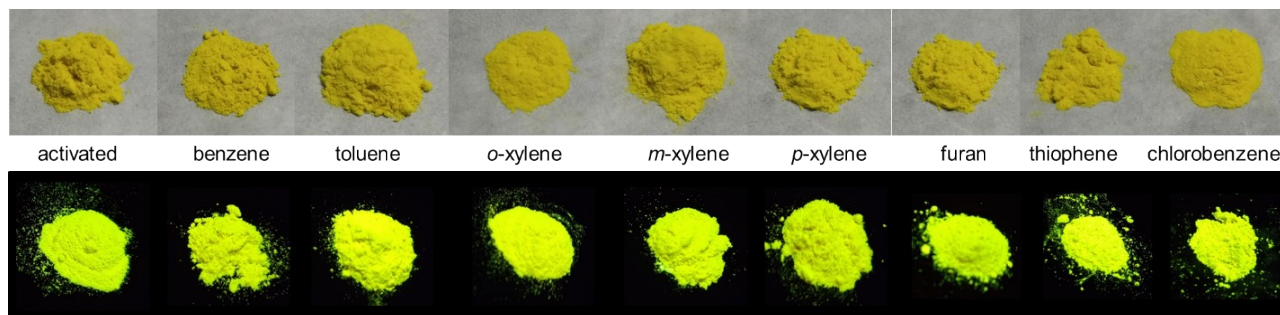

**Fig. S37** Photographs of activated monomer crystals before and after exposing to various aromatic vapors. Top: sunlight; Bottom: 365 nm UV illuminations.

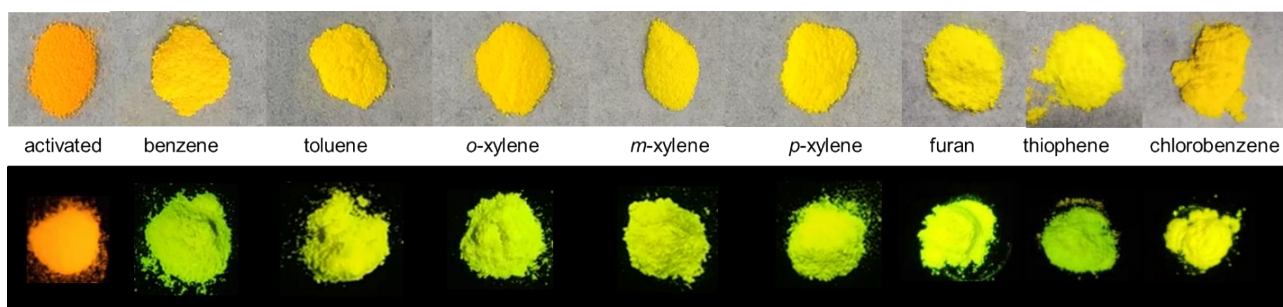

**Fig. S38** Photographs of MC- $\gamma$  before and after exposing to various aromatic vapors. Top: sunlight; Bottom: 365 nm UV illuminations.

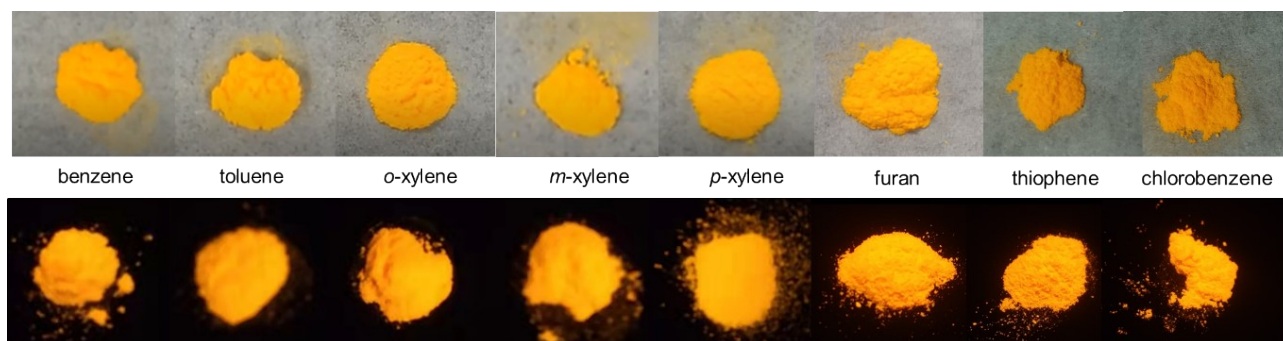

**Fig. S39** Photographs of aromatics-loaded MC- $\gamma$  after desorption of aromatics under vacuum at 65 °C for 12 h. Top: sunlight; Bottom: 365 nm UV illuminations.

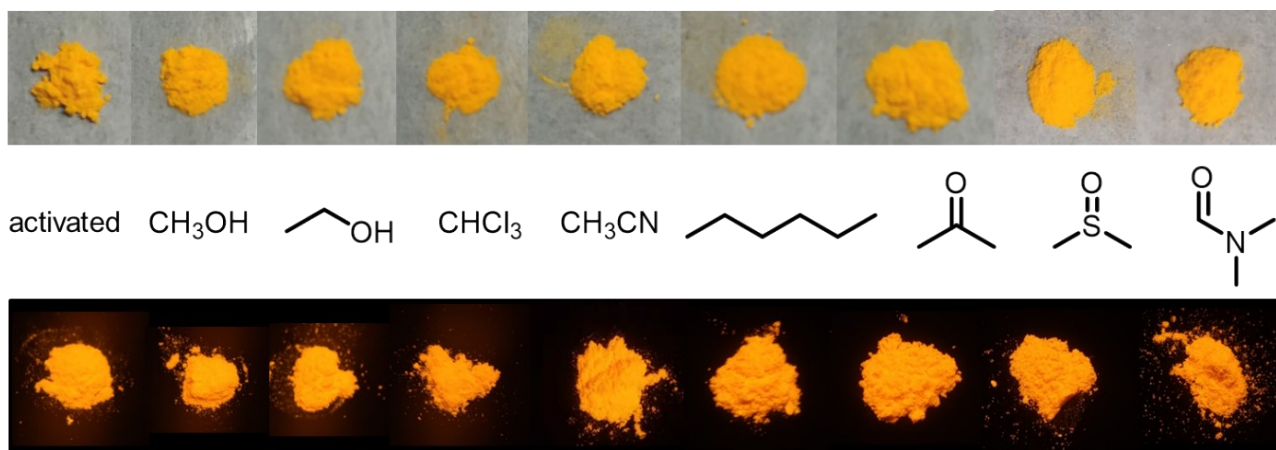

**Fig. S40** Photographs of MC- $\gamma$  after exposing to non-aromatic VOCs. Top: sunlight; Bottom: 365 nm UV illuminations.

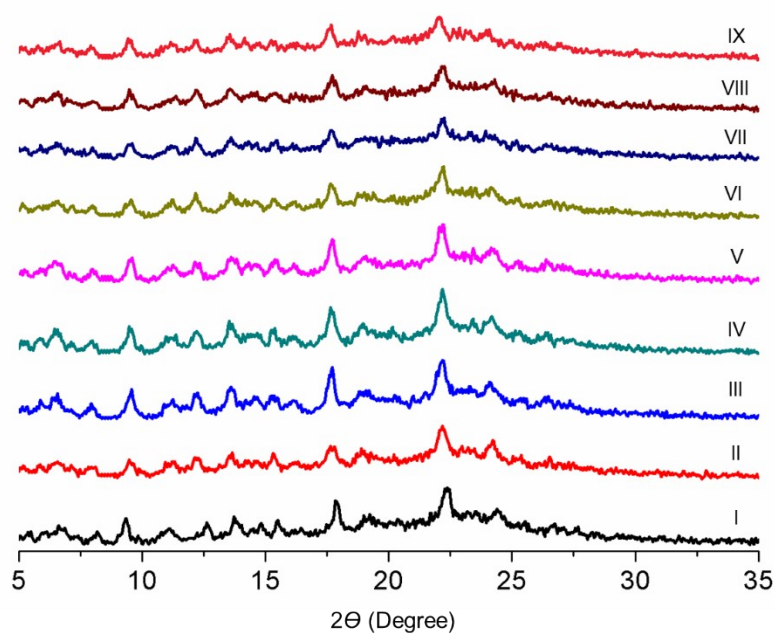

**Fig. S41** PXRD patterns of aromatics-loaded MC- $\gamma$  after desorption of aromatic vapors under vacuum at 65 °C for 12 h, (I) activated, (II) benzene, (III) toluene, (IV) *o*-xylene, (V) *m*-xylene, (VI) *p*-xylene, (VII) furan, (VIII) thiophene, and (IX) chlorobenzene.

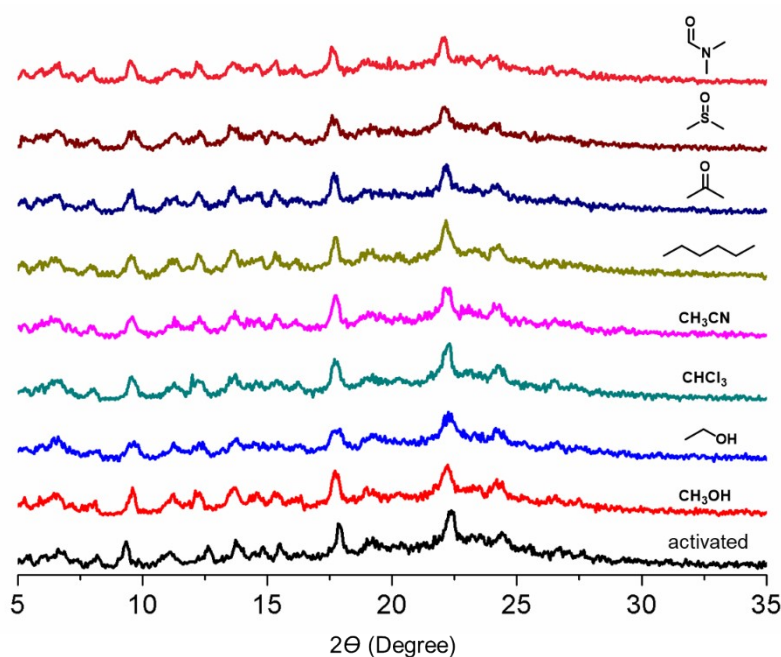

**Fig. S42** PXRD patterns of MC- $\gamma$  after exposing to other common VOCs.

## 8. Crystallography data

**Monomer:** Single crystals, suitable for X-ray crystallography, were obtained as yellow block by slow vapor diffusion of hexane (1 mL) into a dichloromethane (2 mL) solution of monomer (10 mg) at room temperature for 7 days. Crystal data of monomer was collected on Bruker smart Apex 2.

**Table S1** Crystal data and structure refinement for monomer

|                        |                             |                              |
|------------------------|-----------------------------|------------------------------|
| CCDC                   | 2106790                     |                              |
| Empirical formula      | $C_{36}H_{34}N_2O_4$        |                              |
| Formula weight         | 558.65                      |                              |
| Temperature            | 193(2) K                    |                              |
| Wavelength             | 0.71073 Å                   |                              |
| Crystal system         | Triclinic                   |                              |
| Space group            | P-1                         |                              |
| Unit cell dimensions   | $a = 11.537(2)$ Å           | $\alpha = 76.480(4)^\circ$ . |
|                        | $b = 13.782(3)$ Å           | $\beta = 80.728(3)^\circ$ .  |
|                        | $c = 22.883(4)$ Å           | $\gamma = 69.280(3)^\circ$ . |
| Volume                 | $3296.6(11)$ Å <sup>3</sup> |                              |
| Z                      | 4                           |                              |
| Density (calculated)   | 1.126 Mg/m <sup>3</sup>     |                              |
| Absorption coefficient | 0.073 mm <sup>-1</sup>      |                              |
| F(000)                 | 1184                        |                              |

|                                   |                                                   |
|-----------------------------------|---------------------------------------------------|
| Crystal size                      | 0.120 x 0.110 x 0.090 mm <sup>3</sup>             |
| Theta range for data collection   | 0.919 to 25.010°.                                 |
| Index ranges                      | -13<=h<=13, -16<=k<=15, -24<=l<=27                |
| Reflections collected             | 24994                                             |
| Independent reflections           | 11534 [R(int) = 0.0523]                           |
| Completeness to theta = 25.010°   | 99.1 %                                            |
| Refinement method                 | Full-matrix least-squares on F <sup>2</sup>       |
| Data / restraints / parameters    | 11534 / 662 / 872                                 |
| Goodness-of-fit on F <sup>2</sup> | 1.136                                             |
| Final R indices [I>2sigma(I)]     | R <sub>1</sub> = 0.0722, wR <sub>2</sub> = 0.1460 |
| R indices (all data)              | R <sub>1</sub> = 0.1253, wR <sub>2</sub> = 0.1652 |
| Extinction coefficient            | n/a                                               |
| Largest diff. peak and hole       | 0.299 and -0.466 e.Å <sup>-3</sup>                |

**MC- $\alpha$** : Single crystals, suitable for X-ray crystallography, were obtained as yellow block by slow vapor diffusion of diethyl ether (1 mL) into a 1,2-dichloroethane (2 mL) solution of **MC** (5 mg) at room temperature for 8 days. Crystal data was collected on Bruker smart Apex 2.

**Table S2** Crystal data and structure refinement for **MC- $\alpha$**

|                                  |                                                                                                                    |
|----------------------------------|--------------------------------------------------------------------------------------------------------------------|
| CCDC                             | 2106793                                                                                                            |
| Empirical formula                | C <sub>74</sub> H <sub>66</sub> N <sub>4</sub> O <sub>8</sub>                                                      |
| Formula weight                   | 1139.30                                                                                                            |
| Temperature/K                    | 193.0                                                                                                              |
| Crystal system                   | monoclinic                                                                                                         |
| Space group                      | P2 <sub>1</sub> /c                                                                                                 |
| Unit cell dimensions             | a = 18.4433(14) Å $\alpha$ = 90°.<br>b = 23.3947(17) Å $\beta$ = 104.809(5)°.<br>c = 19.9340(16) Å $\gamma$ = 90°. |
| Volume/Å <sup>3</sup>            | 8315.3(11)                                                                                                         |
| Z                                | 4                                                                                                                  |
| $\rho_{\text{calc}}/\text{cm}^3$ | 0.910                                                                                                              |
| $\mu/\text{mm}^{-1}$             | 0.301                                                                                                              |
| F(000)                           | 2408.0                                                                                                             |
| Crystal size/mm <sup>3</sup>     | 0.12 × 0.1 × 0.1                                                                                                   |

|                                                  |                                                                |
|--------------------------------------------------|----------------------------------------------------------------|
| Radiation                                        | GaK $\alpha$ ( $\lambda = 1.34139$ )                           |
| 2 $\Theta$ range for data collection/ $^{\circ}$ | 4.312 to 104.194                                               |
| Index ranges                                     | $-21 \leq h \leq 20, -27 \leq k \leq 27, -23 \leq l \leq 23$   |
| Reflections collected                            | 62236                                                          |
| Independent reflections                          | 14168 [ $R_{\text{int}} = 0.1137, R_{\text{sigma}} = 0.0999$ ] |
| Data/restraints/parameters                       | 14168/9/783                                                    |
| Goodness-of-fit on $F^2$                         | 1.069                                                          |
| Final R indexes [ $I \geq 2\sigma(I)$ ]          | $R_1 = 0.1525, wR_2 = 0.3214$                                  |
| Final R indexes [all data]                       | $R_1 = 0.2111, wR_2 = 0.3450$                                  |
| Largest diff. peak and hole                      | 0.77 and -0.38 e $\text{\AA}^{-3}$                             |

**MC- $\beta$** : Single crystals, suitable for X-ray crystallography, were obtained as orange block by slow vapor diffusion of isopropyl ether (1 mL) into a chloroform (3 mL) solution of **MC** (5 mg) at room temperature for 10 days. Crystal data was collected on Bruker smart Apex 2.

**Table S3** Crystal data and structure refinement for **MC- $\beta$**

|                                                  |                                                                                                                                                                          |
|--------------------------------------------------|--------------------------------------------------------------------------------------------------------------------------------------------------------------------------|
| CCDC                                             | 2106844                                                                                                                                                                  |
| Empirical formula                                | $C_{75}H_{69}Cl_3N_4O_8$                                                                                                                                                 |
| Formula weight                                   | 1260.69                                                                                                                                                                  |
| Temperature/K                                    | 193.0                                                                                                                                                                    |
| Crystal system                                   | monoclinic                                                                                                                                                               |
| Space group                                      | $C2/c$                                                                                                                                                                   |
| Unit cell dimensions                             | $a = 43.827(7) \text{ \AA}$ $\alpha = 90^{\circ}$ .<br>$b = 6.3265(10) \text{ \AA}$ $\beta = 99.958(8)^{\circ}$ .<br>$c = 28.385(5) \text{ \AA}$ $\gamma = 90^{\circ}$ . |
| Volume/ $\text{\AA}^3$                           | 7752(2)                                                                                                                                                                  |
| Z                                                | 4                                                                                                                                                                        |
| $\rho_{\text{calc}}/\text{cm}^3$                 | 1.080                                                                                                                                                                    |
| $\mu/\text{mm}^{-1}$                             | 0.970                                                                                                                                                                    |
| F(000)                                           | 2648.0                                                                                                                                                                   |
| Crystal size/ $\text{mm}^3$                      | $0.12 \times 0.1 \times 0.1$                                                                                                                                             |
| Radiation                                        | GaK $\alpha$ ( $\lambda = 1.34139$ )                                                                                                                                     |
| 2 $\Theta$ range for data collection/ $^{\circ}$ | 3.562 to 107.814                                                                                                                                                         |
| Index ranges                                     | $-52 \leq h \leq 52, -7 \leq k \leq 7, -32 \leq l \leq 34$                                                                                                               |



|                                         |                                                                  |
|-----------------------------------------|------------------------------------------------------------------|
| Reflections collected                   | 31492                                                            |
| Independent reflections                 | 7106 [ $R_{\text{int}} = 0.0998$ , $R_{\text{sigma}} = 0.0891$ ] |
| Data/restraints/parameters              | 7106/18/428                                                      |
| Goodness-of-fit on $F^2$                | 1.204                                                            |
| Final R indexes [ $I \geq 2\sigma(I)$ ] | $R_1 = 0.1427$ , $wR_2 = 0.4229$                                 |
| Final R indexes [all data]              | $R_1 = 0.1759$ , $wR_2 = 0.4535$                                 |
| Largest diff. peak and hole             | 1.46 and $-0.58 \text{ e } \text{\AA}^{-3}$                      |

**MC-t:** Single crystals, suitable for X-ray crystallography, were obtained as yellow block by slow vapor diffusion of diethyl ether (1 mL) into a dichloromethane (3 mL) solution of **MC** (5 mg) at room temperature for 5 days. Crystal data was collected on Bruker smart Apex 2.

**Table S4** Crystal data and structure refinement for **MC-t**

|                                               |                                                                                                                                                                                    |
|-----------------------------------------------|------------------------------------------------------------------------------------------------------------------------------------------------------------------------------------|
| CCDC                                          | 2106866                                                                                                                                                                            |
| Empirical formula                             | $\text{C}_{155}\text{H}_{142}\text{N}_8\text{O}_{16}$                                                                                                                              |
| Formula weight                                | 2372.76                                                                                                                                                                            |
| Temperature/K                                 | 141.0                                                                                                                                                                              |
| Crystal system                                | triclinic                                                                                                                                                                          |
| Space group                                   | P-1                                                                                                                                                                                |
| Unit cell dimensions                          | $a = 14.645(5) \text{ \AA}$ $\alpha = 101.803(9)^\circ$ .<br>$b = 17.153(5) \text{ \AA}$ $\beta = 101.803(9)^\circ$ .<br>$c = 17.234(6) \text{ \AA}$ $\gamma = 111.239(7)^\circ$ . |
| Volume/ $\text{\AA}^3$                        | 3896(2)                                                                                                                                                                            |
| Z                                             | 1                                                                                                                                                                                  |
| $\rho_{\text{calc}}/\text{cm}^3$              | 1.011                                                                                                                                                                              |
| $\mu/\text{mm}^{-1}$                          | 0.331                                                                                                                                                                              |
| F(000)                                        | 1256.0                                                                                                                                                                             |
| Crystal size/ $\text{mm}^3$                   | $0.12 \times 0.1 \times 0.1$                                                                                                                                                       |
| Radiation                                     | $\text{GaK}\alpha$ ( $\lambda = 1.34139$ )                                                                                                                                         |
| $2\Theta$ range for data collection/ $^\circ$ | 4.62 to 107.798                                                                                                                                                                    |
| Index ranges                                  | $-17 \leq h \leq 17$ , $-20 \leq k \leq 20$ , $-20 \leq l \leq 17$                                                                                                                 |
| Reflections collected                         | 36417                                                                                                                                                                              |
| Independent reflections                       | 14019 [ $R_{\text{int}} = 0.1522$ , $R_{\text{sigma}} = 0.1846$ ]                                                                                                                  |
| Data/restraints/parameters                    | 14019/210/909                                                                                                                                                                      |

|                                         |                                                   |
|-----------------------------------------|---------------------------------------------------|
| Goodness-of-fit on F <sup>2</sup>       | 1.079                                             |
| Final R indexes [ $I \geq 2\sigma(I)$ ] | R <sub>1</sub> = 0.1449, wR <sub>2</sub> = 0.3106 |
| Final R indexes [all data]              | R <sub>1</sub> = 0.2512, wR <sub>2</sub> = 0.3550 |
| Largest diff. peak and hole             | 0.62/-0.37 e Å <sup>-3</sup>                      |

**MC-m:** Single crystals, suitable for X-ray crystallography, were obtained as yellow block by slow vapor diffusion of isopropyl ether (1 mL) into a chloroform (3 mL) solution of **MC** (5 mg) at room temperature for 6 days. Crystal data was collected on Bruker smart Apex 2.

**Table S5** Crystal data and structure refinement for **MC-m**

|                                         |                                                                                                                            |
|-----------------------------------------|----------------------------------------------------------------------------------------------------------------------------|
| CCDC                                    | 2106858                                                                                                                    |
| Empirical formula                       | C <sub>83</sub> H <sub>79</sub> Cl <sub>3</sub> N <sub>4</sub> O <sub>8</sub>                                              |
| Formula weight                          | 1366.85                                                                                                                    |
| Temperature/K                           | 170.0                                                                                                                      |
| Crystal system                          | triclinic                                                                                                                  |
| Space group                             | P-1                                                                                                                        |
| Unit cell dimensions                    | a = 14.6237(13) Å      α = 111.446(3)°<br>b = 17.0225(18) Å      β = 100.673(4)°<br>c = 17.1904(15) Å      γ = 100.673(4)° |
| Volume/Å <sup>3</sup>                   | 3863.6(6)                                                                                                                  |
| Z                                       | 2                                                                                                                          |
| ρ <sub>calc</sub> /cm <sup>3</sup>      | 1.175                                                                                                                      |
| μ/mm <sup>-1</sup>                      | 0.175                                                                                                                      |
| F(000)                                  | 1440.0                                                                                                                     |
| Crystal size/mm <sup>3</sup>            | 0.11 × 0.05 × 0.03                                                                                                         |
| Radiation                               | MoKα (λ = 0.71073)                                                                                                         |
| 2θ range for data collection/°          | 3.818 to 52.83                                                                                                             |
| Index ranges                            | -18 ≤ h ≤ 17, -21 ≤ k ≤ 21, -21 ≤ l ≤ 21                                                                                   |
| Reflections collected                   | 44193                                                                                                                      |
| Independent reflections                 | 15674 [R <sub>int</sub> = 0.0799, R <sub>sigma</sub> = 0.1106]                                                             |
| Data/restraints/parameters              | 15674/0/902                                                                                                                |
| Goodness-of-fit on F <sup>2</sup>       | 1.025                                                                                                                      |
| Final R indexes [ $I \geq 2\sigma(I)$ ] | R <sub>1</sub> = 0.0761, wR <sub>2</sub> = 0.1764                                                                          |
| Final R indexes [all data]              | R <sub>1</sub> = 0.1605, wR <sub>2</sub> = 0.2254                                                                          |

Largest diff. peak and hole

0.47/-0.75 e Å<sup>-3</sup>

**MC-p**: Single crystals, suitable for X-ray crystallography, were obtained as yellow block by slow vapor diffusion of diethyl ether (1 mL) into a dichloromethane (3 mL) solution of **MC** (5 mg) at room temperature for 6 days. Crystal data was collected on Bruker smart Apex 2.

**Table S6** Crystal data and structure refinement for **MC-p**

|                                    |                                                                |                  |
|------------------------------------|----------------------------------------------------------------|------------------|
| CCDC                               | 2106870                                                        |                  |
| Empirical formula                  | C <sub>98</sub> H <sub>98</sub> N <sub>4</sub> O <sub>8</sub>  |                  |
| Formula weight                     | 1459.80                                                        |                  |
| Temperature/K                      | 170.0                                                          |                  |
| Crystal system                     | triclinic                                                      |                  |
| Space group                        | P-1                                                            |                  |
| Unit cell dimensions               | a = 13.346(4) Å                                                | α = 86.647(10)°. |
|                                    | b = 16.214(5) Å                                                | β = 74.030(10)°. |
|                                    | c = 20.118(6) Å                                                | γ = 78.328(9)°.  |
| Volume/Å <sup>3</sup>              | 4099(2)                                                        |                  |
| Z                                  | 2                                                              |                  |
| ρ <sub>calc</sub> /cm <sup>3</sup> | 1.183                                                          |                  |
| μ/mm <sup>-1</sup>                 | 0.074                                                          |                  |
| F(000)                             | 1556.0                                                         |                  |
| Crystal size/mm <sup>3</sup>       | 0.11 × 0.03 × 0.02                                             |                  |
| Radiation                          | MoKα (λ = 0.71073)                                             |                  |
| 2θ range for data collection/°     | 4.212 to 50.054                                                |                  |
| Index ranges                       | -14 ≤ h ≤ 15, -19 ≤ k ≤ 19, -23 ≤ l ≤ 23                       |                  |
| Reflections collected              | 40800                                                          |                  |
| Independent reflections            | 14384 [R <sub>int</sub> = 0.1657, R <sub>sigma</sub> = 0.2129] |                  |
| Data/restraints/parameters         | 14384/0/1005                                                   |                  |
| Goodness-of-fit on F <sup>2</sup>  | 0.984                                                          |                  |
| Final R indexes [I ≥ 2σ (I)]       | R <sub>1</sub> = 0.0980, wR <sub>2</sub> = 0.2078              |                  |
| Final R indexes [all data]         | R <sub>1</sub> = 0.2182, wR <sub>2</sub> = 0.2678              |                  |
| Largest diff. peak/hole            | 0.30/-0.37 e Å <sup>-3</sup>                                   |                  |

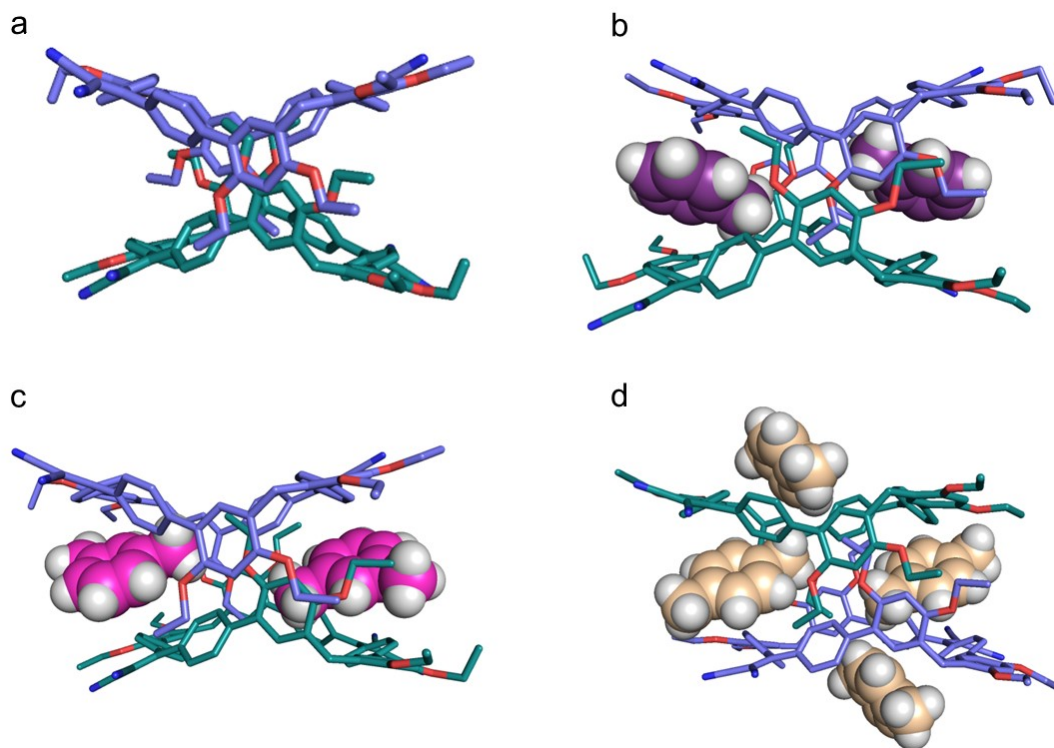

**Fig. S43** Side view of the double-included geometry of (a) **MC- $\alpha$** , (b) **MC-t**, (c) **MC-m** and (d) **MC-p**. Hydrogen atoms are omitted for clarity.

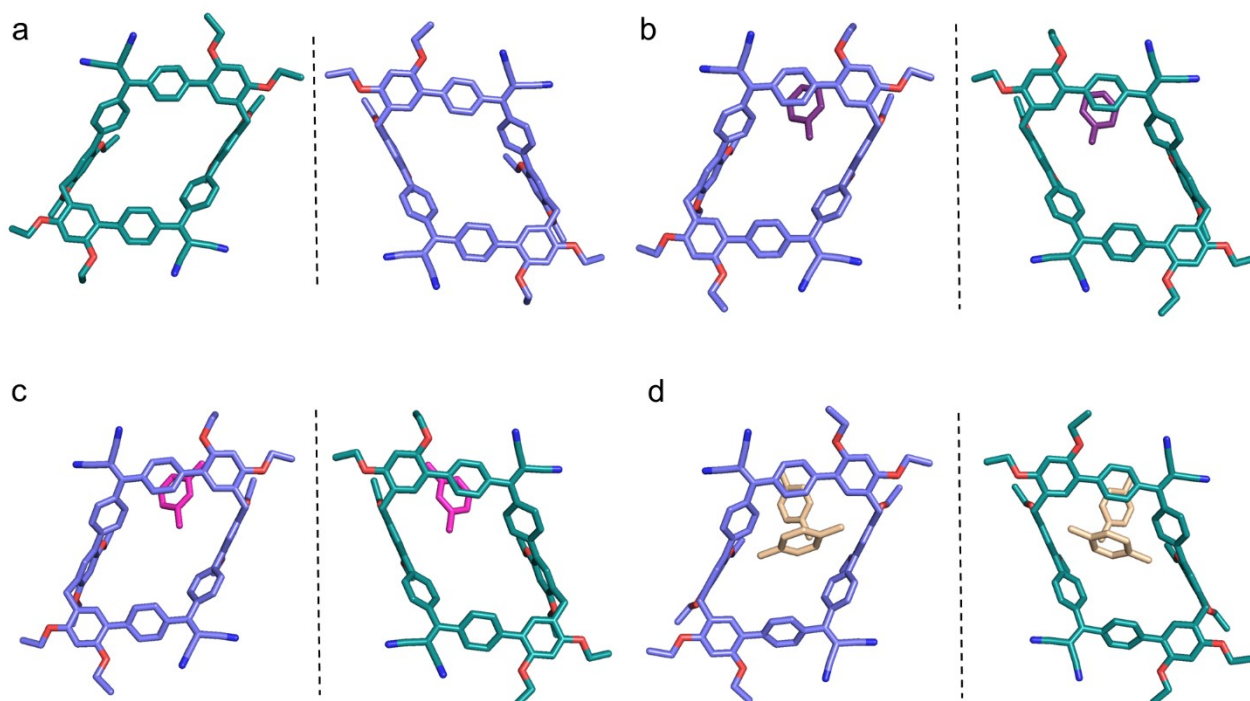

**Fig. S44** A pair of enantiomers in (a) **MC- $\alpha$** , (b) **MC-t**, (c) **MC-m** and (d) **MC-p**. The hydrogen atoms are omitted for clarity.

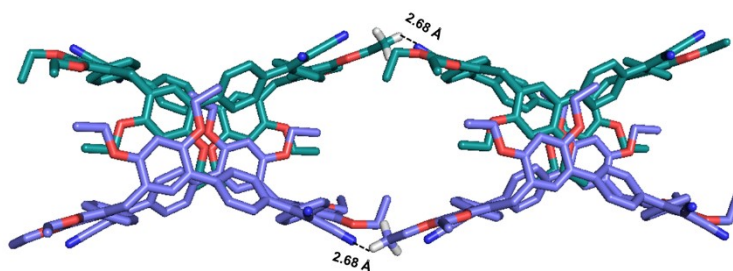

**Fig. S45** Top view of the pseudo cavity of **MC- $\alpha$**  and the C-H $\cdots$ N interactions (2.68 Å) between two double-included dimers. Part of the hydrogen atoms are omitted for clarity.

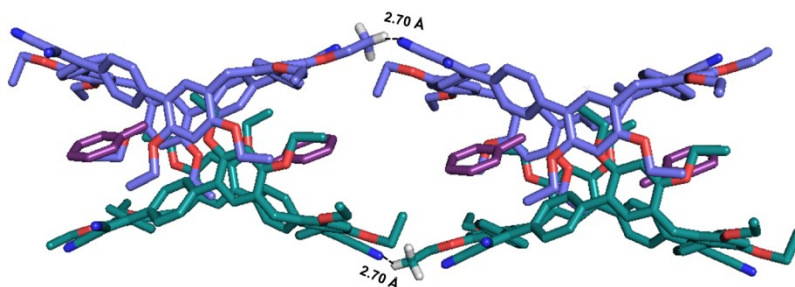

**Fig. S46** Top view of the pseudo cavity of **MC-t** and the C-H $\cdots$ N interactions (2.70 Å) between two double-included dimers. Part of the hydrogen atoms are omitted for clarity.

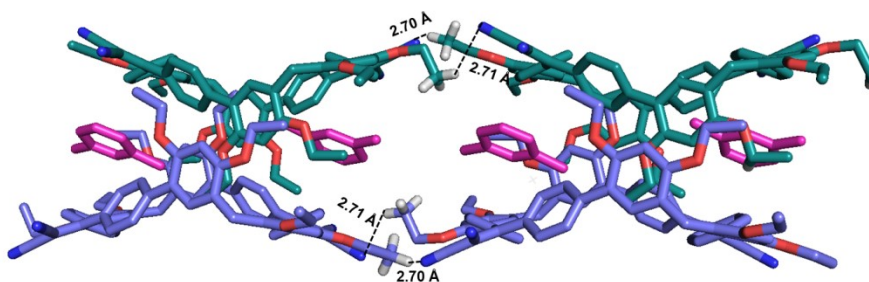

**Fig. S47** Top view of the pseudo cavity of **MC-m** and the C-H $\cdots$ N interactions (2.70 and 2.71 Å) between two double-included dimers. Part of the hydrogen atoms are omitted for clarity.

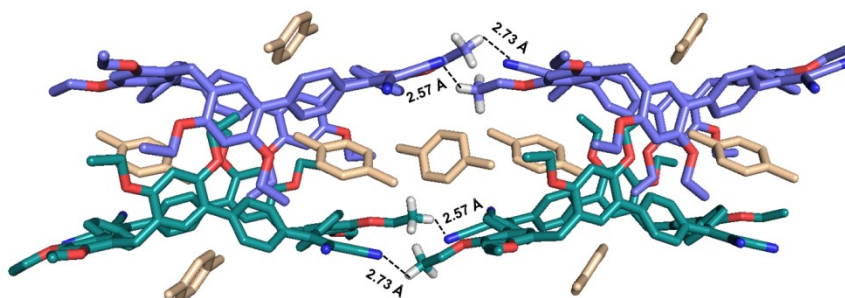

**Fig. S48** Top view of the pseudo cavity of **MC-p** and the C-H $\cdots$ N interactions (2.57 and 2.73 Å) between two double-included dimers. Part of the hydrogen atoms are omitted for clarity.

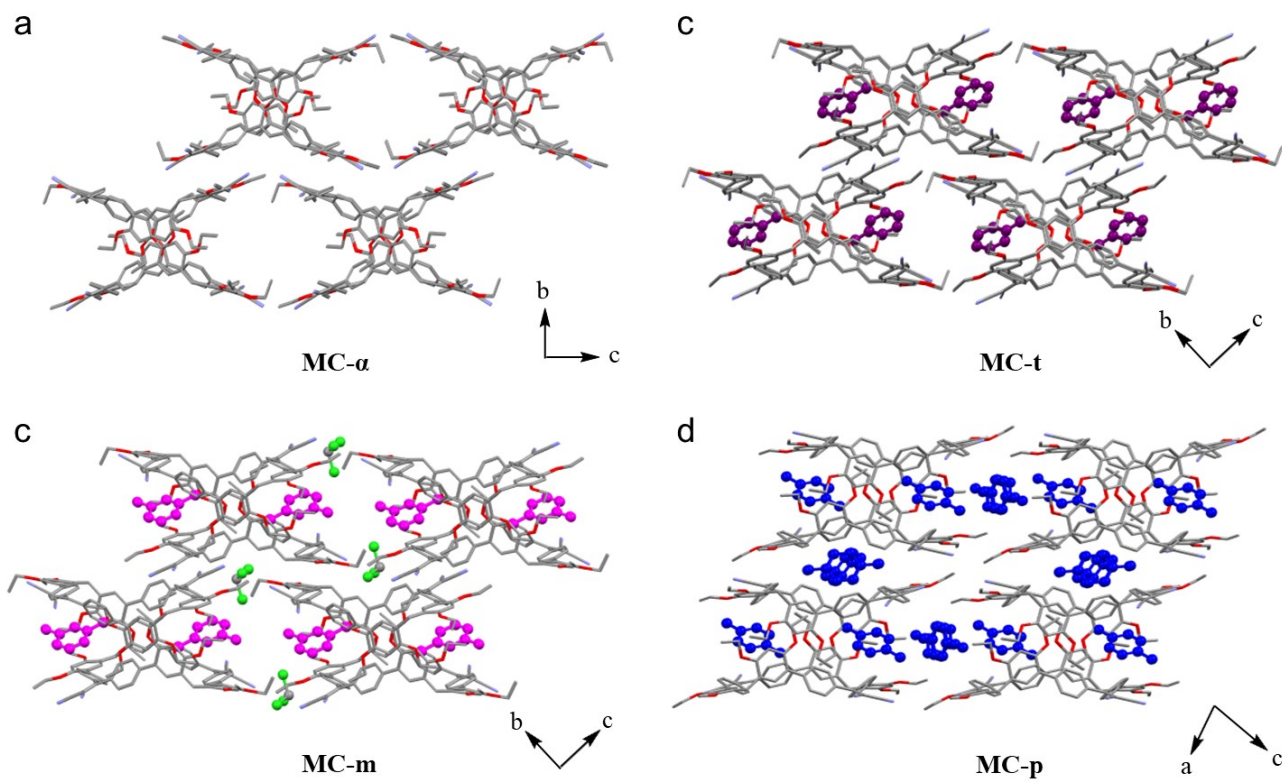

**Fig. S49** The stacking mode of MC- $\alpha$ , MC-t, MC-m and MC-p. For clarity, some hydrogen atoms and solvents are omitted.
